# Supplementary material for: Organocatalytic multicomponent synthesis of polysubstituted pyrroles from 1,2-diones, aldehydes and arylamines
Source: Royal Society of Chemistry journal article supplement (doi:10.1039/c5cc05624a), 2015-01-01

## Supporting information

### Table of Contents

|                                                             |                   |
|-------------------------------------------------------------|-------------------|
| 1. Experimental section                                     | Page 1 – Page 6   |
| 2. Crystallography data of Compound <b>12</b>               | Page 6 – Page 6   |
| 3. Copies of <sup>1</sup> H and <sup>13</sup> C NMR Spectra | Page 7 – Page 29  |
| 4. Copies of HRMS spectra                                   | Page 30 – Page 39 |

#### 1. Experimental section

##### 1.1 General Methods

All reagents and solvents were commercial grade and purified prior to use when necessary. NMR spectra were acquired on a Varian 400 MHz instrument. Chemical shifts are measured relative to residual solvent peaks as an internal standard set to  $\delta$  7.26 and  $\delta$  77.0 (CDCl<sub>3</sub>),  $\delta$  2.50 and  $\delta$  39.52 (DMSO-*d*<sub>6</sub>). HRMS was performed on a Varian QFT-ESI instrument. Melting points were determined on a Taike X-4 melting point apparatus. All temperatures were uncorrected.

##### 1.2 Preparation of 1-arylpropan-1,2-diones **8b-d** <sup>[1,2]</sup>

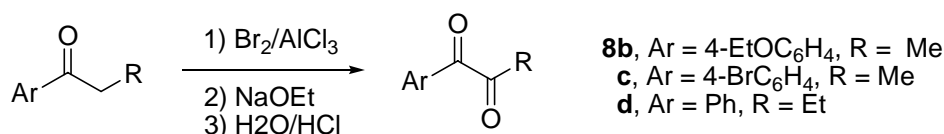

To a mixture of the corresponding ketone (30 mmol) and anhydrous aluminum chloride (0.15 g) in ether (45 mL) was added bromine (11.5 g, 72 mmol) at a rate to maintain a gentle reflux. When the reaction was complete (monitored by TLC), the solvent was removed under reduced pressure to obtain an oil. The oil was slowly added to a solution of sodium ethoxide in ethanol (formed by 72 mmol of sodium and 45 mL of ethanol) and the resulting mixture was stirred at room temperature for 1 h. Then, concentrated hydrochloric acid (15 mL) was added and the mixture was stirred at room temperature for 3 h. The precipitate was filtered off and the filtrate was diluted with 30 mL of water, and extracted with methylene chloride (3×15 mL). The combined organic layers were dried over magnesium sulfate and concentrated under reduced pressure. The crude product was purified by column chromatography on silica gel (200–300 mesh, eluted with petroleum ether:ethyl acetate = 20:1) to afford the target compound **8**.

1-(4-Ethoxyphenyl)propane-1,2-dione (**8b**): Yellow liquid, 55% yield. <sup>1</sup>H NMR (400 MHz, CDCl<sub>3</sub>):  $\delta$  7.98 (d, *J* = 8.4 Hz, 2 H), 6.95 (d, *J* = 8.4 Hz, 2 H), 4.11 (q, *J* = 6.8 Hz, 2 H), 2.48 (s, 3 H), 1.44 (t, *J* = 6.8 Hz, 3 H). <sup>13</sup>C NMR (100.6 MHz, CDCl<sub>3</sub>):  $\delta$  201.2, 190.0, 164.2, 132.8, 124.4, 114.6, 63.9, 26.4, 14.5.

1-(4-Bromophenyl)propane-1,2-dione (**8c**): Yellow liquid, 62% yield. <sup>1</sup>H NMR (400 MHz, CDCl<sub>3</sub>):  $\delta$  7.85 (d, *J* = 8.4 Hz, 2 H), 7.58 (d, *J* = 8.4 Hz, 2 H), 2.48 (s, 3 H). <sup>13</sup>C NMR (100.6 MHz, CDCl<sub>3</sub>):  $\delta$  199.6, 189.5, 132.0, 131.7, 130.5, 130.0, 26.1.

1-Phenylbutane-1,2-dione (**8d**): Pale yellow liquid, 43% yield. <sup>1</sup>H NMR (400 MHz, CDCl<sub>3</sub>):  $\delta$  7.98 (d, *J* = 8.0 Hz, 2 H), 7.64 (t, *J* = 7.6 Hz, 1 H), 7.58 (t, *J* = 7.6 Hz, 2 H), 2.92 (q, *J* = 7.2 Hz, 2 H), 1.20 (t, *J* = 7.2 Hz, 3 H). <sup>13</sup>C NMR (100.6 MHz, CDCl<sub>3</sub>):  $\delta$  203.7, 192.4, 134.4, 131.9, 130.0, 128.7, 32.0, 6.7.

##### 1.3 3-(p-Tolylthio)-1-(4-bromophenyl)-2-hydroxyprop-2-en-1-one (**8e**):

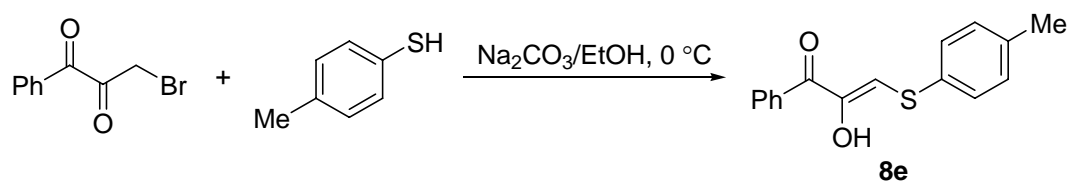

To a solution of 4-methylbenzenethiol (5 mmol) in ethanol (20 mL) was added aqueous sodium carbonate (6 mmol of sodium carbonate in 15 mL of water). Then, to the resulting mixture was added dropwise a solution of 3-bromo-1-phenylpropane-1,2-dione (5 mmol) in ethanol (5 mL) at 0 °C. After completion of the reaction (monitored by TLC), the reaction mixture was diluted with water (25 mL), and extracted with methylene chloride (3×20 mL). The combined organic layers were dried over magnesium sulfate and concentrated under reduced pressure. The residue was purified by column chromatography on silica gel (200–300 mesh, eluted with petroleum ether:ethyl acetate = 20:1) to afford compound **8e** as a pale yellow oil in 62% yield. NMR analysis indicates that this compound exists predominantly in its enol form. <sup>1</sup>H NMR (400 MHz, CDCl<sub>3</sub>): δ 7.66 (d, *J* = 7.6 Hz, 2 H), 7.53 (t, *J* = 7.6 Hz, 1 H), 7.43 (t, *J* = 7.6 Hz, 2 H), 7.33 (d, *J* = 8.0 Hz, 2 H), 7.15 (d, *J* = 8.0 Hz, 2 H), 6.96 (s, 1 H), 6.57 (s, 1 H), 2.34 (s, 3 H). <sup>13</sup>C NMR (100.6 MHz, CDCl<sub>3</sub>): δ 187.8, 144.8, 138.3, 135.7, 132.1, 130.8, 130.2, 130.2, 128.8, 128.4, 123.2, 21.1.

#### 1.4 Preparation of 2-ethoxy-*N*-(4-methoxyphenyl)-*N*-(1-(4-methoxyphenyl)-2,5-diphenyl-1*H*-pyrrol-3-yl)acetamide (**12**):

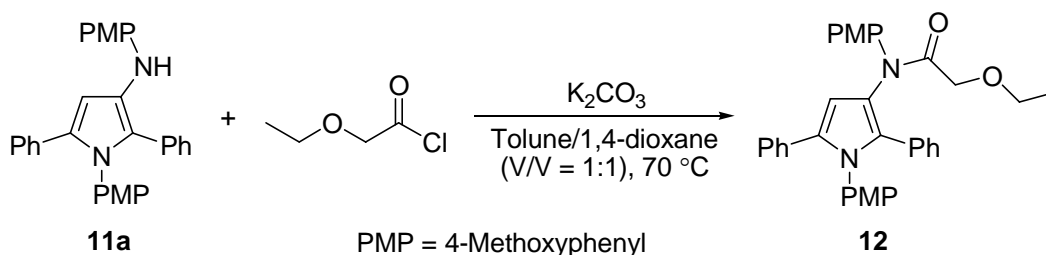

To a stirring mixture of 1-bis(4-methoxyphenyl)-2,5-diphenyl-1*H*-pyrrol-3-amine **11a** (447 mg, 1 mmol), potassium carbonate (415 mg, 3 mmol) in toluene/1,4-dioxane (40 mL, V/V = 1:1) was added 2-ethoxyacetyl chloride (147 mg, 1.2 mmol) in one portion. The resulting mixture was stirred under a nitrogen atmosphere at 70 °C for 5 h. After cooling to room temperature, the reaction mixture was quenched with water (20 mL) and extracted with methylene chloride (3×30 mL). The combined organic layers were dried over magnesium sulfate, filtered and concentrated under reduced pressure. The residue was purified by column chromatography on silica gel (200–300 mesh, eluted with petroleum ether/ethyl acetate = 6:1) to afford the corresponding amide **12** as a white solid. 383 mg, 72% yield, m.p. 95–97 °C. <sup>1</sup>H NMR (400 MHz, CDCl<sub>3</sub>): δ 7.09–7.26 (m, 10 H), 7.68–6.90 (m, 8 H), 6.47 (s, 1 H), 4.13 (s, 2 H), 3.75 (s, 3 H), 3.73 (s, 3 H), 3.50 (q, *J* = 6.8 Hz, 2 H), 1.93 (t, *J* = 6.8 Hz, 3 H). <sup>13</sup>C NMR (100.6 MHz, CDCl<sub>3</sub>): δ 170.3, 158.5, 157.0, 136.0, 134.1, 132.1, 131.4, 130.9, 130.5, 130.1, 129.8, 129.6, 128.4, 128.0, 127.4, 126.7, 126.2, 123.5, 114.4, 113.8, 113.7, 108.6, 107.6, 69.4, 66.8, 55.3, 55.2, 15.0. HRMS (ESI) *m/z* calc'd for C<sub>37</sub>H<sub>33</sub>N<sub>2</sub>O<sub>2</sub>S [M+H]<sup>+</sup>: 533.2435, found 533.2437.

#### 1.5 General procedure for the synthesis of polysubstituted pyrroles **11**

To a solution of 1,2-dione **8** (0.2 mmol), arylamine **9** (0.44 mmol), and aldehyde **10** (0.2 mmol) in acetonitrile (1 mL) was added 4-methylbenzenesulfonic acid monohydrate (20 mol%) at room temperature. The resulting mixture was stirred for the total consumption of 1,2-dione **8**

(Monitored by TLC). Work-up procedure A: After completion of the reaction, the product was precipitated by the addition of 1 mL of petroleum ether followed by cooling to 0 °C. The precipitate was filtered off, and washed with cold petroleum ether to afford the pure product (Table 2, entries 1, 5–9, 11 and 12). Work-up procedure B: After removal of the solvent in vacuo, the residue was purified by column chromatography on silica gel (200–300 mesh, eluted with petroleum ether:ethyl acetate = 20:1) to afford polysubstituted pyrrole **11** (Table 2, entries 3, 4, 9, and 12–17).

*N*,1-Bis(4-methoxyphenyl)-2,5-diphenyl-1*H*-pyrrol-3-amine (**11a**): Yellow solid, m.p. 158–160 °C, 84% yield. <sup>1</sup>H NMR (400 MHz, CDCl<sub>3</sub>): δ 7.05–7.15 (m, 6 H), 6.96–7.05 (m, 4 H), 6.84 (d, *J* = 9.2 Hz, 2 H), 6.83 (d, *J* = 9.2 Hz, 2 H), 6.72 (d, *J* = 8.8 Hz, 2 H), 6.63 (d, *J* = 8.8 Hz, 2 H), 6.43 (s, 1 H), 5.02 (s, 1 H), 3.68 (s, 3 H), 3.67 (s, 3 H). <sup>13</sup>C NMR (100.6 MHz, CDCl<sub>3</sub>): δ 158.2, 152.7, 140.9, 133.1, 132.9, 131.7, 131.4, 130.0, 129.8, 128.5, 128.1, 127.9, 126.3, 126.1, 126.1, 115.9, 114.7, 113.7, 105.3, 55.7, 55.3. HRMS (ESI) *m/z* calc'd for C<sub>30</sub>H<sub>27</sub>N<sub>2</sub>O<sub>2</sub> [M+H]<sup>+</sup>: 447.2067, found 447.2068.

*N*,1-Bis(3-methoxyphenyl)-2,5-diphenyl-1*H*-pyrrol-3-amine (**11b**): Yellow solid, m.p. 123–125 °C, 67% yield. <sup>1</sup>H NMR (400 MHz, CDCl<sub>3</sub>): δ 7.05–7.22 (m, 12 H), 6.75 (dd, *J* = 8.4, 2.0 Hz, 1 H), 6.59 (d, *J* = 8.0 Hz, 1 H), 6.57 (s, 1 H), 6.50–6.54 (m, 3 H), 6.34 (dd, *J* = 8.4, 2.0 Hz, 1 H), 5.27 (s, 1 H), 3.77 (s, 3 H), 3.53 (s, 3 H). <sup>13</sup>C NMR (100.6 MHz, CDCl<sub>3</sub>): δ 160.8, 159.5, 148.6, 139.6, 133.1, 132.8, 131.2, 130.0, 129.9, 129.2, 128.8, 128.5, 128.4, 128.1, 127.9, 127.1, 126.6, 126.4, 125.8, 124.8, 121.2, 114.2, 114.1, 113.3, 107.2, 106.6, 103.2, 100.1, 55.2, 55.1. HRMS (ESI) *m/z* calc'd for C<sub>30</sub>H<sub>27</sub>N<sub>2</sub>O<sub>2</sub> [M+H]<sup>+</sup>: 447.2067, found 447.2073.

*N*,1-Bis(2-methoxyphenyl)-2,5-diphenyl-1*H*-pyrrol-3-amine (**11c**): Redish brown solid, m.p. 116–118 °C, 73% yield. <sup>1</sup>H NMR (400 MHz, CDCl<sub>3</sub>): δ 7.09–7.25 (m, 12 H), 7.01 (dd, *J* = 7.6, 1.6 Hz, 1 H), 6.88 (dt, *J* = 8.0, 1.2 Hz, 1 H), 6.78–6.84 (m, 3 H), 6.72 (dt, *J* = 8.0, 1.2 Hz, 1 H), 6.61 (s, 1 H), 5.83 (s, 1 H), 3.83 (s, 3 H), 3.40 (s, 3 H). <sup>13</sup>C NMR (100.6 MHz, CDCl<sub>3</sub>): δ 155.5, 146.9, 137.2, 133.6, 133.4, 131.7, 130.8, 129.4, 129.0, 128.1, 127.9, 127.8 (2 C), 127.7, 126.2, 126.1, 124.5, 121.1, 120.5, 117.0, 112.1, 112.1, 110.0, 106.0, 55.6, 55.3. HRMS (ESI) *m/z* calc'd for C<sub>30</sub>H<sub>27</sub>N<sub>2</sub>O<sub>2</sub> [M+H]<sup>+</sup>: 447.2067, found 447.2075.

2,5-Diphenyl-*N*,1-di(*p*-tolyl)-1*H*-pyrrol-3-amine (**11d**): Yellow solid, m.p. 154–156 °C, 79% yield. <sup>1</sup>H NMR (400 MHz, CDCl<sub>3</sub>): δ 7.13–7.21 (m, 6 H), 7.04–7.11 (m, 4 H), 7.03 (d, *J* = 8.4 Hz, 2 H), 7.00 (d, *J* = 8.0 Hz, 2 H), 6.89 (d, *J* = 8.0 Hz, 2 H), 6.88 (d, *J* = 8.0 Hz, 2 H), 6.56 (s, 1 H), 5.19 (s, 1 H), 2.31 (s, 3 H), 2.28 (s, 3 H). <sup>13</sup>C NMR (100.6 MHz, CDCl<sub>3</sub>): δ 144.7, 136.7, 136.1, 133.0 (2 C), 131.4, 130.1, 129.7, 129.2, 128.5, 128.0, 127.9, 127.4, 126.5, 126.4, 126.2, 126.0, 125.6, 114.4, 105.9, 21.1, 20.5. HRMS (ESI) *m/z* calc'd for C<sub>30</sub>H<sub>27</sub>N<sub>2</sub> [M+H]<sup>+</sup>: 415.2169, found 415.2167.

*N*,1-Bis(4-butylphenyl)-2,5-diphenyl-1*H*-pyrrol-3-amine (**11e**): Yellow solid, m.p. 96–98 °C, 70% yield. <sup>1</sup>H NMR (400 MHz, CDCl<sub>3</sub>): δ 7.13–7.19 (m, 6 H), 7.04–7.10 (m, 4 H), 7.03 (d, *J* = 8.4 Hz, 2 H), 7.00 (d, *J* = 8.0 Hz, 2 H), 6.90 (d, *J* = 8.4 Hz, 2 H), 6.89 (d, *J* = 8.4 Hz, 2 H), 6.58 (s, 1 H), 5.04 (br. s, 1 H), 2.57 (t, *J* = 7.6 Hz, 2 H), 2.54 (t, *J* = 7.6 Hz, 2 H), 1.52–1.62 (m, 4 H), 1.26–1.42 (m, 4 H), 0.93 (t, *J* = 7.6 Hz, 3 H), 0.92 (t, *J* = 7.6 Hz, 3 H). <sup>13</sup>C NMR (100.6 MHz, CDCl<sub>3</sub>): δ 144.8, 141.7, 136.3, 133.0, 132.7, 131.4, 130.1, 129.0, 128.6 (2 C), 128.5, 128.0, 127.9, 126.4, 126.3, 126.1, 125.9, 125.7, 114.4, 105.8, 35.1, 34.8, 34.0, 33.3, 22.4, 22.1, 14.0, 13.9. HRMS (ESI) *m/z* calc'd for C<sub>36</sub>H<sub>39</sub>N<sub>2</sub> [M+H]<sup>+</sup>: 499.3108, found 499.3118.

*N*,1,2,5-Tetraphenyl-1*H*-pyrrol-3-amine (**11f**): Yellow solid, m.p. 147–148 °C, 84% yield. <sup>1</sup>H

NMR (400 MHz, CDCl<sub>3</sub>):  $\delta$  7.17–7.24 (m, 11 H), 7.00–7.10 (m, 6 H), 6.96 (d,  $J$  = 8.0 Hz, 2 H), 6.79 (t,  $J$  = 7.2 Hz, 1 H), 6.60 (s, 1 H). <sup>13</sup>C NMR (100.6 MHz, CDCl<sub>3</sub>):  $\delta$  147.1, 138.7, 133.1, 132.9, 131.2, 130.1, 129.2, 128.9, 128.6 (2 C), 128.0, 127.9, 127.0, 126.5, 126.3, 125.2, 118.2, 114.2, 106.4. HRMS (ESI)  $m/z$  calc'd for C<sub>28</sub>H<sub>23</sub>N<sub>2</sub> [M+H]<sup>+</sup>: 387.1856, found 387.1857.

*N*,1-Bis(4-fluorophenyl)-2,5-diphenyl-1*H*-pyrrol-3-amine (**11g**): Yellow solid, m.p. 190–192 °C, 79% yield. <sup>1</sup>H NMR (400 MHz, DMSO-*d*<sub>6</sub>):  $\delta$  7.09–7.24 (m, 14 H), 6.90 (t,  $J$  = 8.4 Hz, 2 H), 6.74–6.77 (m, 2 H), 6.44 (s, 1 H). <sup>13</sup>C NMR (100.6 MHz, DMSO-*d*<sub>6</sub>):  $\delta$  160.8 (d,  $J$  = 244.8 Hz), 154.6 (d,  $J$  = 231.8 Hz), 144.8, 135.0 (d,  $J$  = 2.8 Hz), 133.3, 132.4, 131.1 (d,  $J$  = 8.8 Hz), 131.0, 129.9, 129.1, 128.2, 128.1, 127.8, 126.5, 125.5, 125.2, 115.7 (d,  $J$  = 22.7 Hz), 115.2 (d,  $J$  = 22.0 Hz), 113.8 (d,  $J$  = 7.2 Hz), 107.5. HRMS (ESI)  $m/z$  calc'd for C<sub>28</sub>H<sub>21</sub>F<sub>2</sub>N<sub>2</sub> [M+H]<sup>+</sup>: 423.1667, found 423.1673.

*N*,1-Bis(4-methoxyphenyl)-2-phenyl-5-(*p*-tolyl)-1*H*-pyrrol-3-amine (**11h**): Yellow solid, m.p. 178–180 °C, 82% yield. <sup>1</sup>H NMR (400 MHz, CDCl<sub>3</sub>):  $\delta$  7.13–7.21 (m, 14 H), 7.03 (d,  $J$  = 7.2 Hz, 2 H), 6.99 (s, 4 H), 6.93 (d,  $J$  = 8.4 Hz, 2 H), 6.92 (d,  $J$  = 8.4 Hz, 2 H), 6.80 (d,  $J$  = 8.8 Hz, 2 H), 6.72 (d,  $J$  = 8.8 Hz, 2 H), 6.47 (s, 1 H), 5.12 (s, 1 H), 3.68 (s, 6 H), 2.29 (s, 3 H). <sup>13</sup>C NMR (100.6 MHz, CDCl<sub>3</sub>):  $\delta$  158.2, 152.7, 141.0, 135.9, 133.3, 131.8, 131.5, 130.1 (2 C), 129.8, 128.7, 128.4, 128.1, 126.3, 125.8, 116.0, 114.7, 113.7, 104.9, 55.8, 55.3, 21.1. HRMS (ESI)  $m/z$  calc'd for C<sub>31</sub>H<sub>29</sub>N<sub>2</sub>O<sub>2</sub> [M+H]<sup>+</sup>: 461.2224, found 461.2229.

*N*,1-Bis(4-methoxyphenyl)-2-phenyl-5-(*o*-tolyl)-1*H*-pyrrol-3-amine (**11i**): Yellow solid, m.p. 107–109 °C, 76% yield. <sup>1</sup>H NMR (400 MHz, CDCl<sub>3</sub>):  $\delta$  7.04–7.21 (m, 9 H), 6.91 (d,  $J$  = 8.8 Hz, 2 H), 6.81 (d,  $J$  = 8.0 Hz, 2 H), 6.79 (d,  $J$  = 8.0 Hz, 2 H), 6.59 (d,  $J$  = 8.8 Hz, 2 H), 6.32 (s, 1 H), 5.14 (s, 1 H), 3.77 (s, 3 H), 3.70 (s, 3 H), 2.13 (s, 3 H). <sup>13</sup>C NMR (100.6 MHz, CDCl<sub>3</sub>):  $\delta$  157.7, 152.7, 141.1, 137.9, 133.1, 132.6, 131.8, 131.7, 129.7 (2 C), 129.1, 128.1, 127.5, 126.1, 125.8, 125.0, 124.3, 115.8, 114.8, 113.4, 106.0, 55.8, 55.2, 20.5. HRMS (ESI)  $m/z$  calc'd for C<sub>31</sub>H<sub>29</sub>N<sub>2</sub>O<sub>2</sub> [M+H]<sup>+</sup>: 461.2224, found 461.2232.

5-(3-Chlorophenyl)-*N*,1-bis(4-methoxyphenyl)-2-phenyl-1*H*-pyrrol-3-amine (**11j**): Yellow solid, m.p. 134–136 °C, 86% yield. <sup>1</sup>H NMR (400 MHz, CDCl<sub>3</sub>):  $\delta$  7.07–7.20 (m, 8 H), 6.82–6.93 (m, 7 H), 6.74 (d,  $J$  = 8.8 Hz, 2 H), 6.52 (s, 1 H), 5.24 (s, 1 H), 3.77 (s, 6 H). <sup>13</sup>C NMR (100.6 MHz, CDCl<sub>3</sub>):  $\delta$  158.5, 152.9, 140.7, 134.7, 133.8, 131.6, 131.4, 131.2, 130.1, 129.7, 129.1, 128.3, 128.1, 126.7, 126.6 (2 C), 126.4, 126.1, 116.1, 114.8, 113.9, 105.7, 55.8, 55.3. HRMS (ESI)  $m/z$  calc'd for C<sub>30</sub>H<sub>26</sub>ClN<sub>2</sub>O<sub>2</sub> [M+H]<sup>+</sup>: 481.1677, found 481.1680.

*N*,1-Bis(4-methoxyphenyl)-5-(4-nitrophenyl)-2-phenyl-1*H*-pyrrol-3-amine (**11k**): Yellow solid, m.p. 122–124 °C, 87% yield. <sup>1</sup>H NMR (400 MHz, CDCl<sub>3</sub>):  $\delta$  8.02 (d,  $J$  = 8.0 Hz, 2 H), 7.17–7.26 (m, 5 H), 7.08 (s, 2 H), 6.91–6.96 (m, 4 H), 6.78–6.83 (m, 4 H), 6.68 (s, 1 H), 5.12 (s, 1 H), 3.79 (s, 6 H). <sup>13</sup>C NMR (100.6 MHz, CDCl<sub>3</sub>):  $\delta$  158.8, 153.2, 145.3, 140.2, 139.2, 131.1, 130.6 (2 C), 130.1, 129.7, 128.5, 128.3, 127.9, 127.5, 127.1, 123.5, 116.5, 114.8, 114.2, 107.0, 55.8, 55.4. HRMS (ESI)  $m/z$  calc'd for C<sub>30</sub>H<sub>26</sub>N<sub>3</sub>O<sub>4</sub> [M+H]<sup>+</sup>: 492.1918, found 492.1925.

5-(Furan-2-yl)-*N*,1-bis(4-methoxyphenyl)-2-phenyl-1*H*-pyrrol-3-amine (**11l**): Yellow solid, m.p. 100–102 °C, 46% yield. <sup>1</sup>H NMR (400 MHz, CDCl<sub>3</sub>):  $\delta$  7.29 (d,  $J$  = 1.6 Hz, 1 H), 7.11–7.21 (m, 7 H), 6.92 (d,  $J$  = 9.2 Hz, 2 H), 6.84 (t,  $J$  = 8.4 Hz, 4 H), 6.70 (s, 1 H), 6.21 (dd,  $J$  = 3.2, 1.6 Hz, 1 H), 5.32 (d,  $J$  = 3.6 Hz, 1 H), 5.09 (s, 1 H), 3.82 (s, 3 H), 3.78 (s, 3 H). <sup>13</sup>C NMR (100.6 MHz, CDCl<sub>3</sub>):  $\delta$  159.0, 152.8, 147.5, 140.8, 140.6, 131.7, 130.9, 130.2, 129.8, 128.1, 126.9, 126.5, 126.4, 125.1, 122.3, 116.0, 114.8, 113.9, 110.8, 105.1, 103.9, 55.8, 55.3. HRMS (ESI)  $m/z$  calc'd for C<sub>28</sub>H<sub>25</sub>N<sub>2</sub>O<sub>3</sub> [M+H]<sup>+</sup>: 437.1860, found 437.1866.

*N*,1-Bis(4-methoxyphenyl)-2-phenyl-5-styryl-1*H*-pyrrol-3-amine (**11m**): Redish-brown solid, m.p. 137–139 °C, 54% yield. <sup>1</sup>H NMR (400 MHz, DMSO-*d*<sub>6</sub>): δ 7.27 (d, *J* = 4.4 Hz, 4 H), 7.06–7.19 (m, 8 H), 6.97 (d, *J* = 8.8 Hz, 2 H), 6.92 (d, *J* = 16.4 Hz, 1 H), 6.83 (s, 1 H), 6.77 (d, *J* = 8.8 Hz, 2 H), 6.71 (d, *J* = 8.8 Hz, 2 H), 6.70 (s, 1 H), 6.62 (d, *J* = 16.4 Hz, 1 H), 3.78 (s, 3 H), 3.65 (s, 3 H). <sup>13</sup>C NMR (100.6 MHz, DMSO-*d*<sub>6</sub>): δ 158.4, 151.3, 141.8, 137.4, 131.8, 131.1, 130.5, 130.0, 129.2, 128.7, 128.1, 127.8, 127.0, 126.9, 126.0, 125.6, 125.4, 117.4, 114.7, 114.5, 114.2, 103.6, 55.3. HRMS (ESI) *m/z* calc'd for C<sub>32</sub>H<sub>29</sub>N<sub>2</sub>O<sub>2</sub> [M+H]<sup>+</sup>: 473.2224, found 473.2222.

2-(4-Ethoxyphenyl)-*N*,1-bis(4-methoxyphenyl)-5-phenyl-1*H*-pyrrol-3-amine (**11n**): Yellow solid, m.p. 153–155 °C, 81% yield. <sup>1</sup>H NMR (400 MHz, CDCl<sub>3</sub>): δ 7.09–7.21 (m, 5 H), 6.91–6.98 (m, 6 H), 6.81 (d, *J* = 8.4 Hz, 2 H), 6.73 (d, *J* = 8.4 Hz, 4 H), 6.51 (s, 1 H), 3.97 (q, *J* = 6.8 Hz, 2 H), 3.77 (s, 6 H), 1.39 (t, *J* = 6.8 Hz, 3 H). <sup>13</sup>C NMR (100.6 MHz, CDCl<sub>3</sub>): δ 158.1, 157.5, 152.6, 141.2, 133.0, 132.6, 131.8, 131.4, 129.8, 128.4, 127.9, 126.4, 126.0, 125.8, 123.5, 115.7, 114.7, 114.0, 113.7, 105.3, 63.2, 55.7, 55.3, 14.8. HRMS (ESI) *m/z* calc'd for C<sub>32</sub>H<sub>31</sub>N<sub>2</sub>O<sub>3</sub> [M+H]<sup>+</sup>: 491.2329, found 491.2338.

2-(4-Bromophenyl)-*N*,1-bis(4-methoxyphenyl)-5-phenyl-1*H*-pyrrol-3-amine (**11o**): Yellow solid, m.p. 150–152 °C, 83% yield. <sup>1</sup>H NMR (400 MHz, DMSO-*d*<sub>6</sub>): δ 7.36 (d, *J* = 8.4 Hz, 2 H), 7.01–7.22 (m, 9 H), 6.84 (d, *J* = 8.8 Hz, 2 H), 6.76 (d, *J* = 8.8 Hz, 2 H), 6.71 (d, *J* = 8.8 Hz, 2 H), 6.39 (s, 1 H), 3.72 (s, 3 H), 3.64 (s, 3 H). <sup>13</sup>C NMR (100.6 MHz, DMSO-*d*<sub>6</sub>): δ 158.2, 151.3, 141.7, 133.6, 132.5, 131.6, 131.2, 130.7, 130.1, 128.1, 128.0, 126.9, 126.5, 126.3, 119.4, 114.5, 114.0, 106.6, 55.3, 55.2. HRMS (ESI) *m/z* calc'd for C<sub>30</sub>H<sub>26</sub>BrN<sub>2</sub>O<sub>2</sub> [M+H]<sup>+</sup>: 525.1172, found 525.1178.

*N*,1-Bis(4-methoxyphenyl)-4-methyl-2,5-diphenyl-1*H*-pyrrol-3-amine (**11p**): Yellow solid, m.p. 67–69 °C, 67% yield. <sup>1</sup>H NMR (400 MHz, CDCl<sub>3</sub>): δ 7.10–7.24 (m, 8 H), 7.01 (d, *J* = 6.8 Hz, 2 H), 6.85 (d, *J* = 8.8 Hz, 2 H), 6.80 (d, *J* = 8.8 Hz, 2 H), 6.71 (d, *J* = 8.8 Hz, 2 H), 6.65 (d, *J* = 8.8 Hz, 2 H), 5.01 (s, 1 H), 3.77 (s, 3 H), 3.73 (s, 3 H), 2.03 (s, 3 H). <sup>13</sup>C NMR (100.6 MHz, CDCl<sub>3</sub>): δ 157.8, 152.1, 142.6, 132.7, 132.0, 131.5, 130.6, 129.8, 129.8, 128.7, 127.8, 127.7, 126.2, 124.4, 115.9, 114.7, 114.6, 113.5, 55.7, 55.2, 9.7. HRMS (ESI) *m/z* calc'd for C<sub>31</sub>H<sub>29</sub>N<sub>2</sub>O<sub>2</sub> [M+H]<sup>+</sup>: 461.2224, found 461.2230.

4-(*p*-Tolylthio)-*N*,1-bis(4-methoxyphenyl)-2,5-diphenyl-1*H*-pyrrol-3-amine (**11q**): Yellow solid, m.p. 189–191 °C, 43% yield. <sup>1</sup>H NMR (400 MHz, CDCl<sub>3</sub>): δ 7.17–7.19 (m, 3 H), 7.10–7.13 (m, 7 H), 7.01 (d, *J* = 8.4 Hz, 2 H), 6.96 (d, *J* = 8.0 Hz, 2 H), 6.91 (d, *J* = 8.8 Hz, 2 H), 6.68 (d, *J* = 8.8 Hz, 2 H), 6.60 (d, *J* = 8.8 Hz, 2 H), 6.54 (d, *J* = 8.8 Hz, 2 H), 5.04 (s, 1 H), 3.74 (s, 3 H), 3.70 (s, 3 H), 2.26 (s, 3 H). <sup>13</sup>C NMR (100.6 MHz, CDCl<sub>3</sub>): δ 158.3, 152.5, 141.4, 137.7, 135.8, 134.5, 131.5, 131.4, 131.2, 129.8, 129.7, 129.4, 128.7, 128.5, 128.1, 127.8, 127.5, 127.2, 126.5 (2 C), 121.5, 115.7, 114.4, 114.1, 113.7, 107.1, 55.6, 55.3, 20.9. HRMS (ESI) *m/z* calc'd for C<sub>37</sub>H<sub>33</sub>N<sub>2</sub>O<sub>2</sub>S [M+H]<sup>+</sup>: 569.2257, found 569.2264.

5-Cyclohexyl-*N*,1-bis(4-methoxyphenyl)-2-phenyl-1*H*-pyrrol-3-amine (**11r**): Yellow solid, m.p. 80–82 °C, 42% yield. <sup>1</sup>H NMR (400 MHz, CDCl<sub>3</sub>): δ 7.13 (t, *J* = 7.6 Hz, 2 H), 7.07 (d, *J* = 8.8 Hz, 2 H), 7.01–7.06 (m, 3 H), 6.87 (d, *J* = 8.8 Hz, 2 H), 6.82 (d, *J* = 8.8 Hz, 2 H), 6.81 (d, *J* = 8.8 Hz, 2 H), 6.09 (s, 1 H), 5.08 (br. s, 1 H), 3.81 (s, 3 H), 3.78 (s, 3 H), 2.36–2.43 (m, 1 H), 1.78–1.81 (m, 2 H), 1.68–1.71 (m, 2 H), 1.29–1.38 (m, 3 H), 1.11–1.20 (m, 3 H). <sup>13</sup>C NMR (100.6 MHz, CDCl<sub>3</sub>): δ 158.3, 152.5, 141.2, 140.2, 131.8, 131.7, 129.8, 129.4, 128.0, 125.6, 125.3, 123.7, 115.7, 114.7, 113.8, 100.3, 55.8, 55.3, 35.6, 33.9, 26.5, 26.0. HRMS (ESI) *m/z* calc'd for C<sub>30</sub>H<sub>33</sub>N<sub>2</sub>O<sub>2</sub> [M+H]<sup>+</sup>: 453.2537, found 453.2540.

## Reference

1. S. Ammermann, C. Hrib, P. G. Jones, W.-W. du Mont, W. Kowalsky, H.-H. Johannes, *Org. Lett.* **2012**, *14*, 5090.
2. W. R. Tully, *US* 4,643,999, **1984**.

## 2. Crystallography data of Compound 12

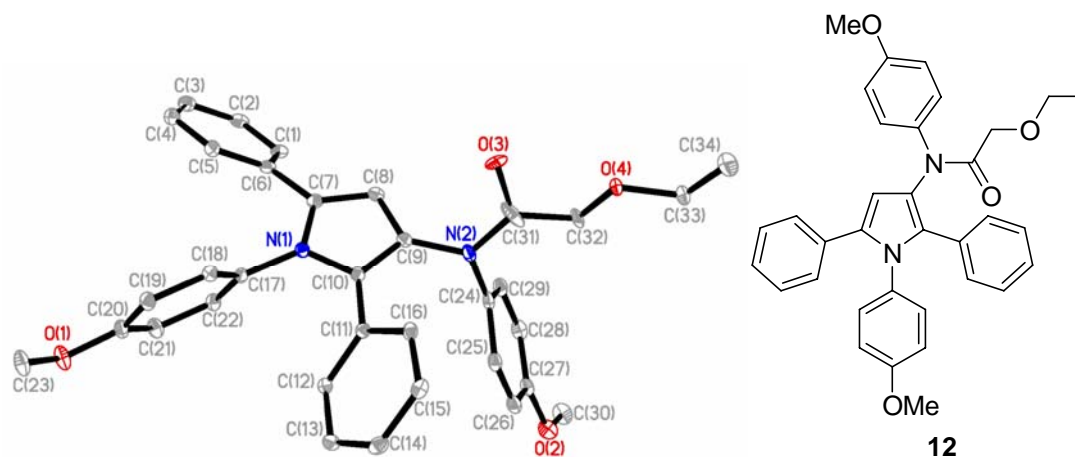

|                                   |                                                                                                                       |
|-----------------------------------|-----------------------------------------------------------------------------------------------------------------------|
| Identification code               | shelxl                                                                                                                |
| Empirical formula                 | C <sub>35</sub> H <sub>34</sub> Cl <sub>2</sub> N <sub>2</sub> O <sub>4</sub>                                         |
| Formula weight                    | 617.54                                                                                                                |
| Temperature                       | 113(2) K                                                                                                              |
| Wavelength                        | 0.71073 Å                                                                                                             |
| Crystal system, space group       | Triclinic, P-1                                                                                                        |
| Unit cell dimensions              | a = 26.271(4) Å    alpha = 90 deg.<br>b = 5.9202(8) Å    beta = 108.458(2) deg.<br>c = 21.057(3) Å    gamma = 90 deg. |
| Volume                            | 3106.5(8) Å <sup>3</sup>                                                                                              |
| Z, Calculated density             | 4, 1.320 Mg/m <sup>3</sup>                                                                                            |
| Absorption coefficient            | 0.251 mm <sup>-1</sup>                                                                                                |
| F(000)                            | 1296                                                                                                                  |
| Crystal size                      | 0.20 x 0.18 x 0.12 mm                                                                                                 |
| Theta range for data collection   | 3.26 to 27.56 deg.                                                                                                    |
| Limiting indices                  | -34 ≤ h ≤ 34, -7 ≤ k ≤ 7, -27 ≤ l ≤ 27                                                                                |
| Reflections collected / unique    | 18964 / 6938 [R(int) = 0.0164]                                                                                        |
| Completeness to theta = 27.56     | 99.3 %                                                                                                                |
| Absorption correction             | Semi-empirical from equivalents                                                                                       |
| Max. and min. transmission        | 0.9705 and 0.9515                                                                                                     |
| Refinement method                 | Full-matrix least-squares on F <sup>2</sup>                                                                           |
| Data / restraints / parameters    | 6938 / 110 / 463                                                                                                      |
| Goodness-of-fit on F <sup>2</sup> | 0.997                                                                                                                 |
| Final R indices [I > 2σ(I)]       | R1 = 0.0306, wR2 = 0.0813                                                                                             |
| R indices (all data)              | R1 = 0.0314, wR2 = 0.0820                                                                                             |
| Largest diff. peak and hole       | 0.391 and -0.345 e.Å <sup>-3</sup>                                                                                    |

### 3. Copies of $^1\text{H}$ and $^{13}\text{C}$ NMR Spectra

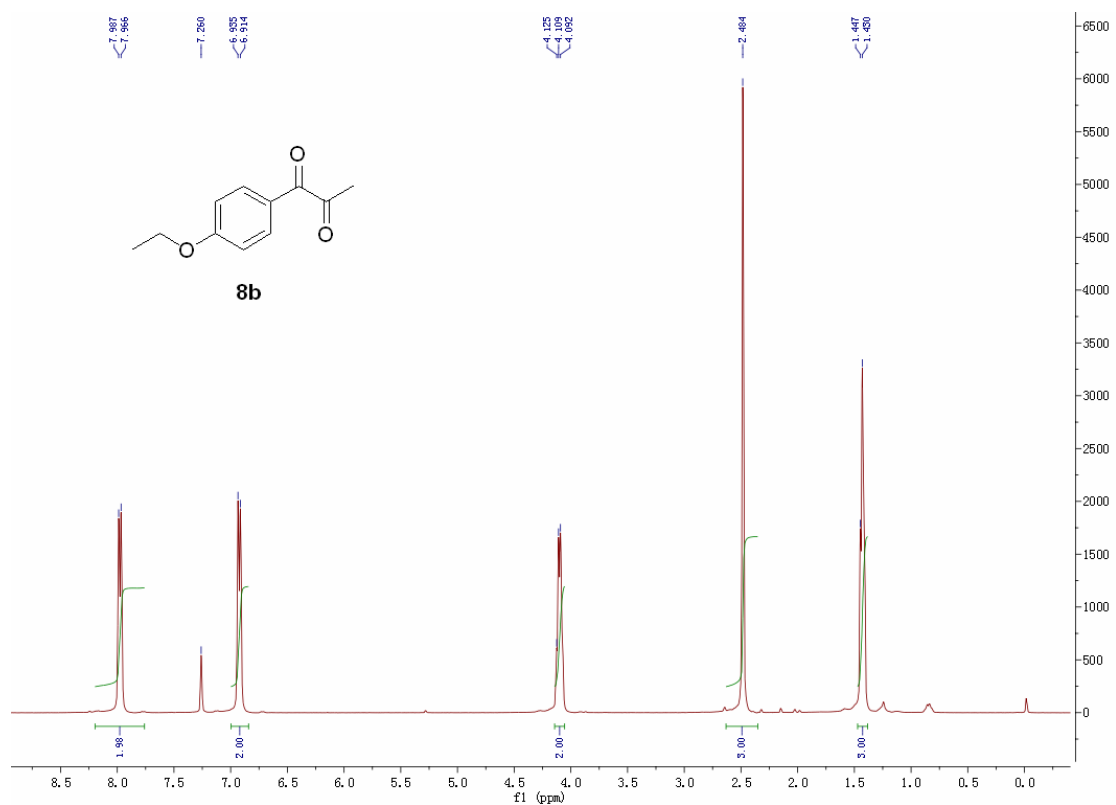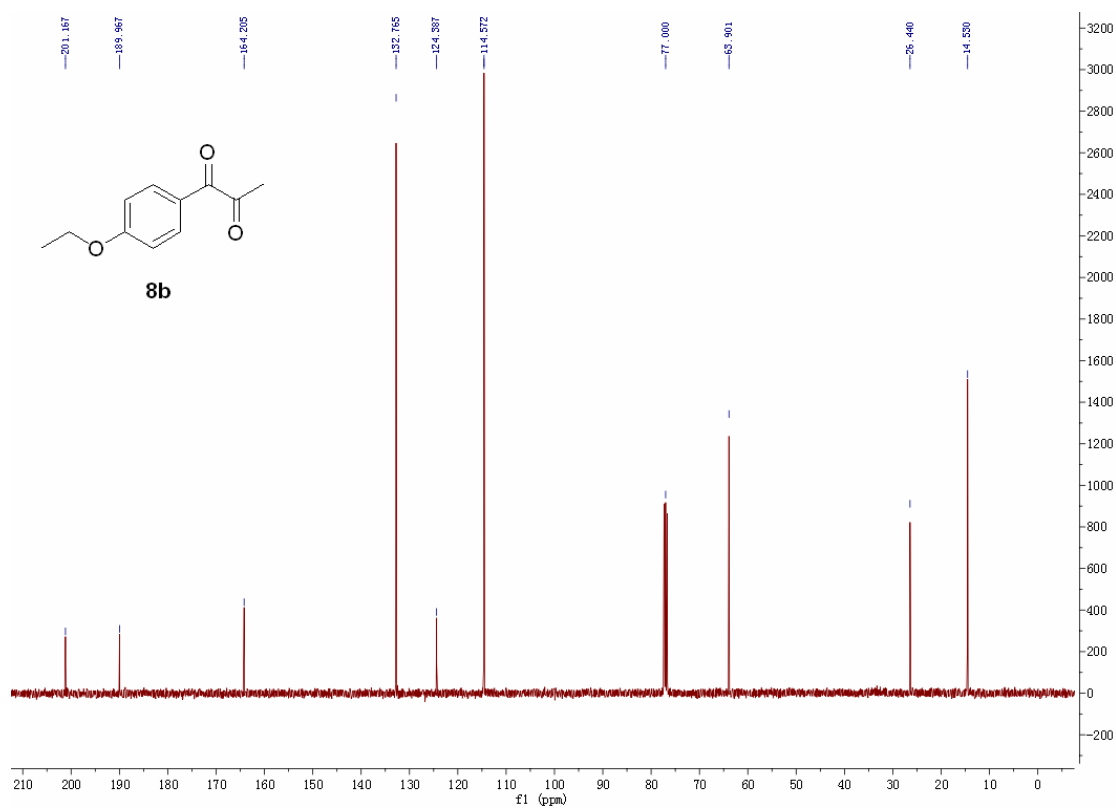

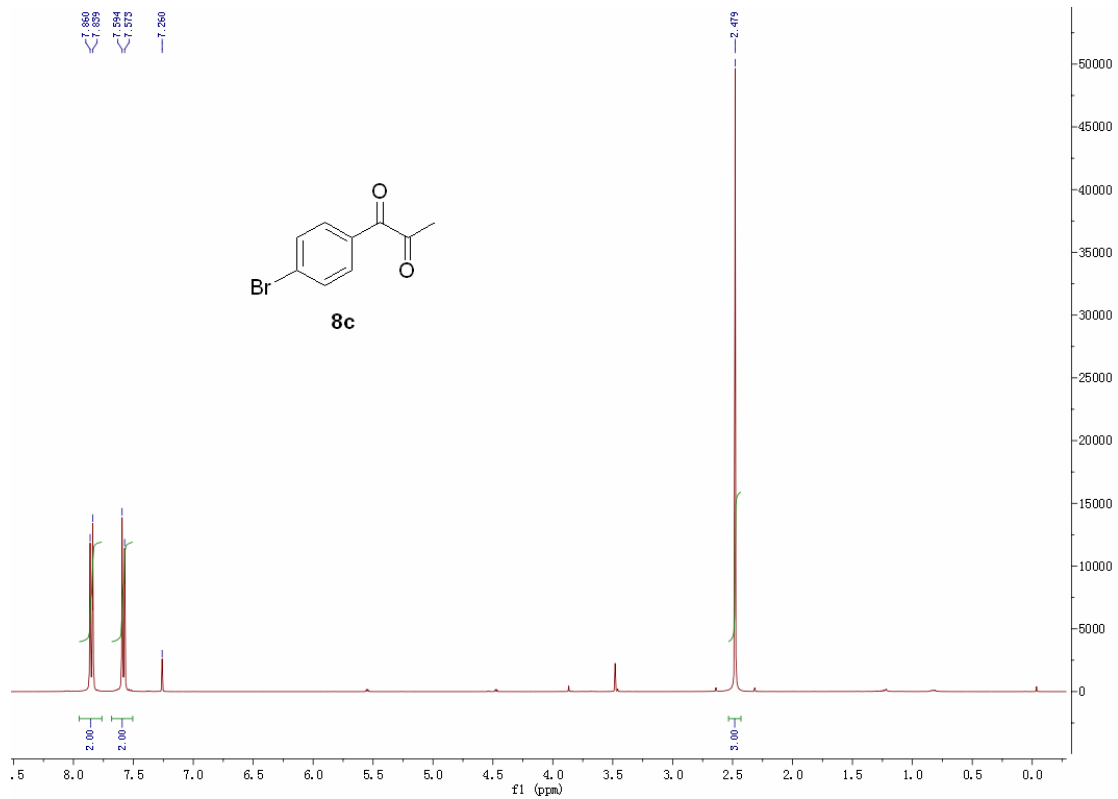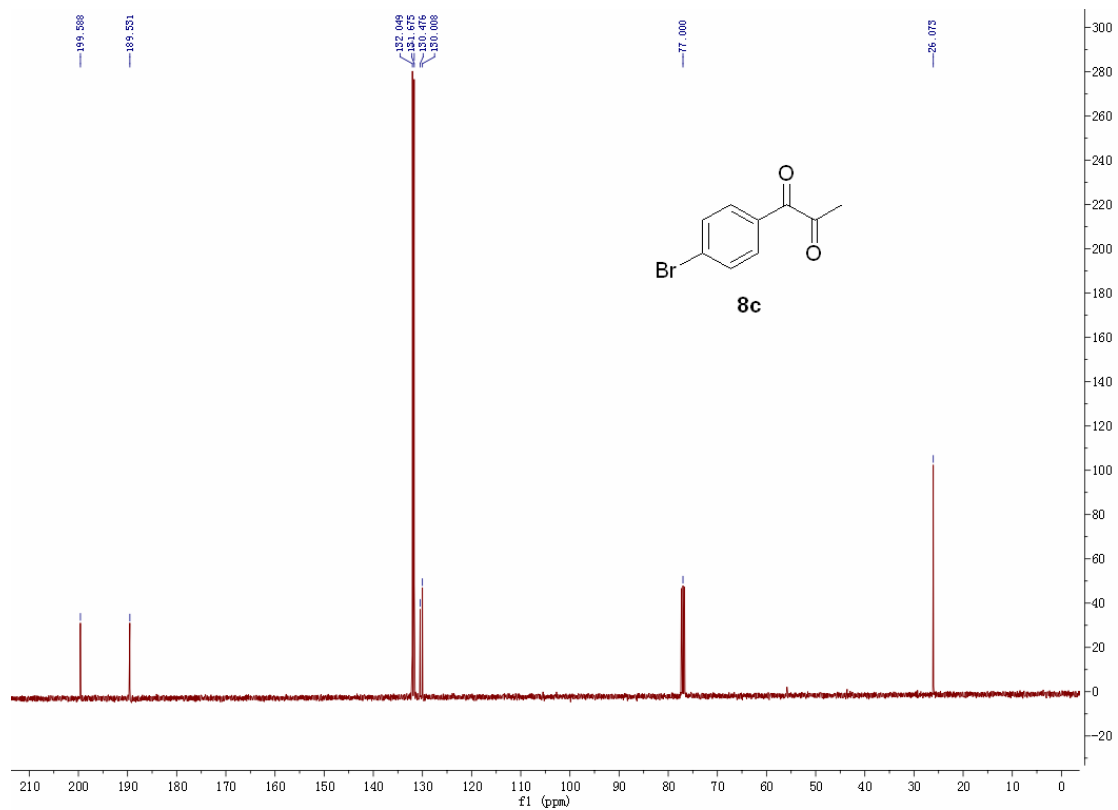



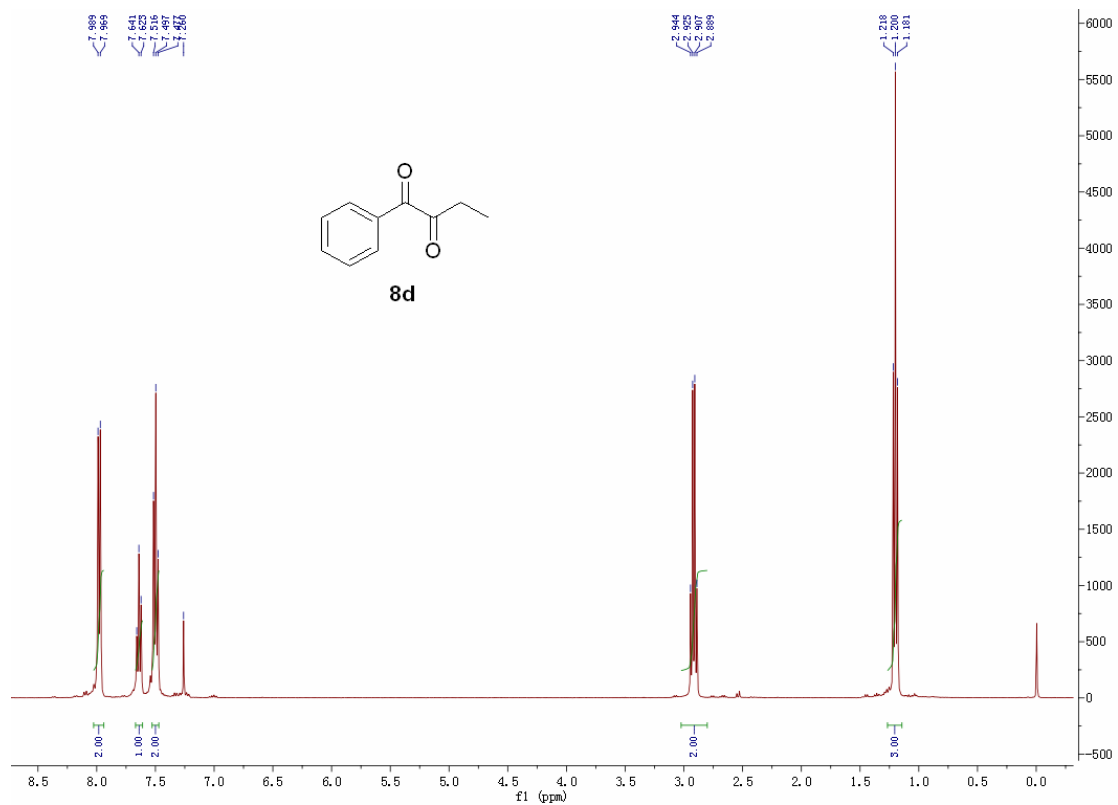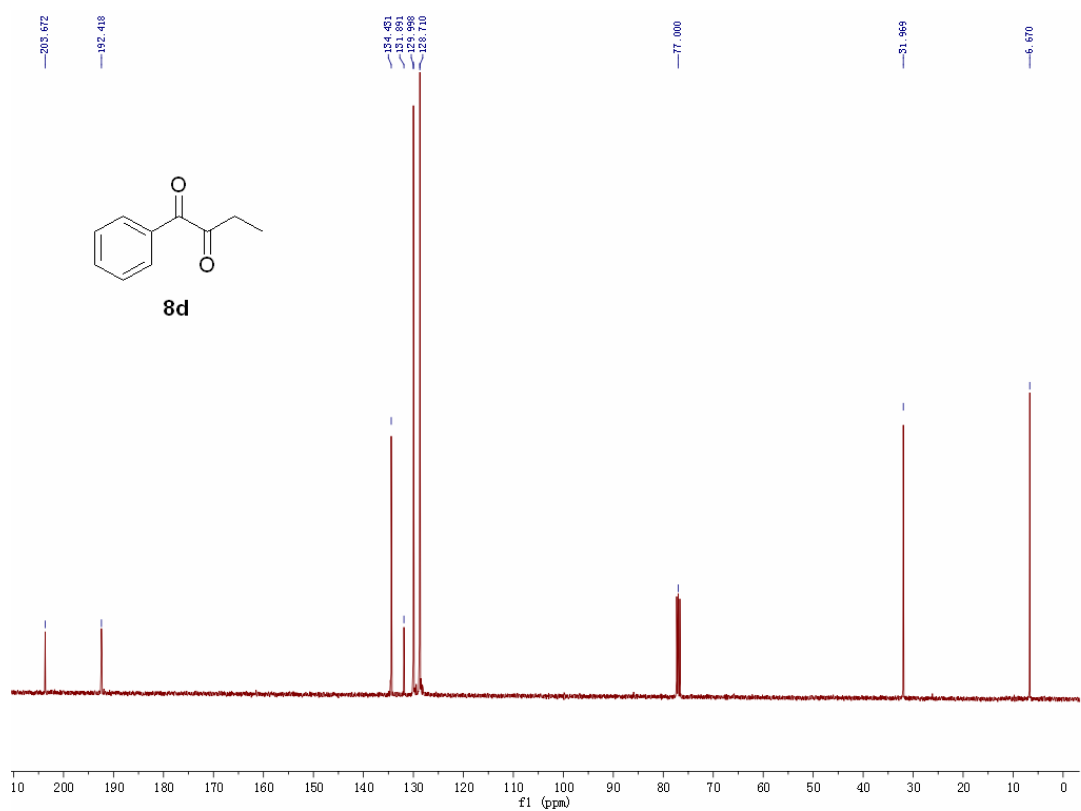

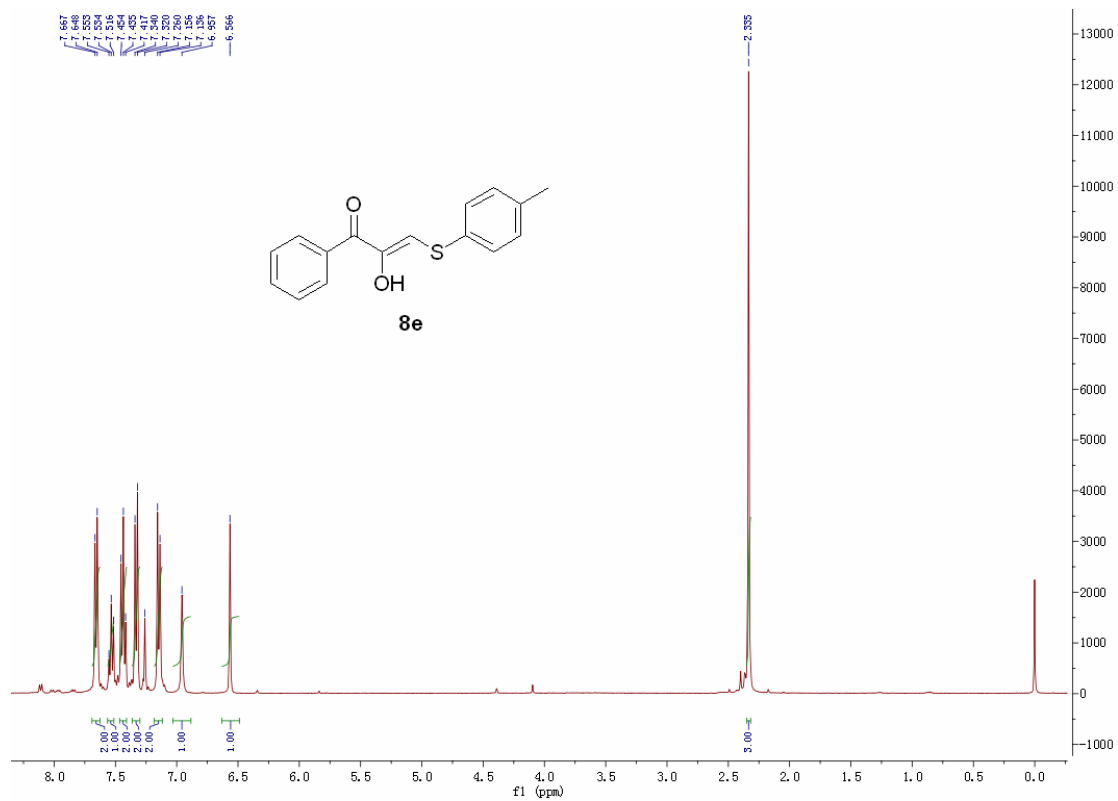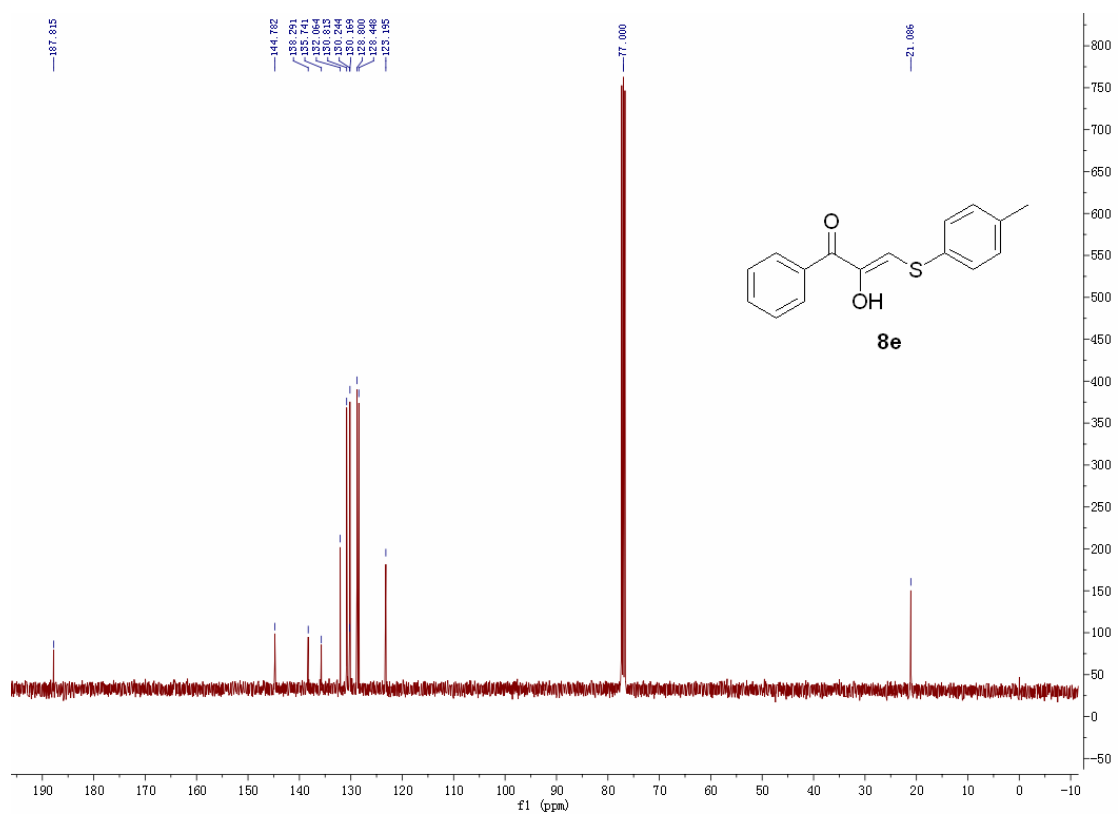

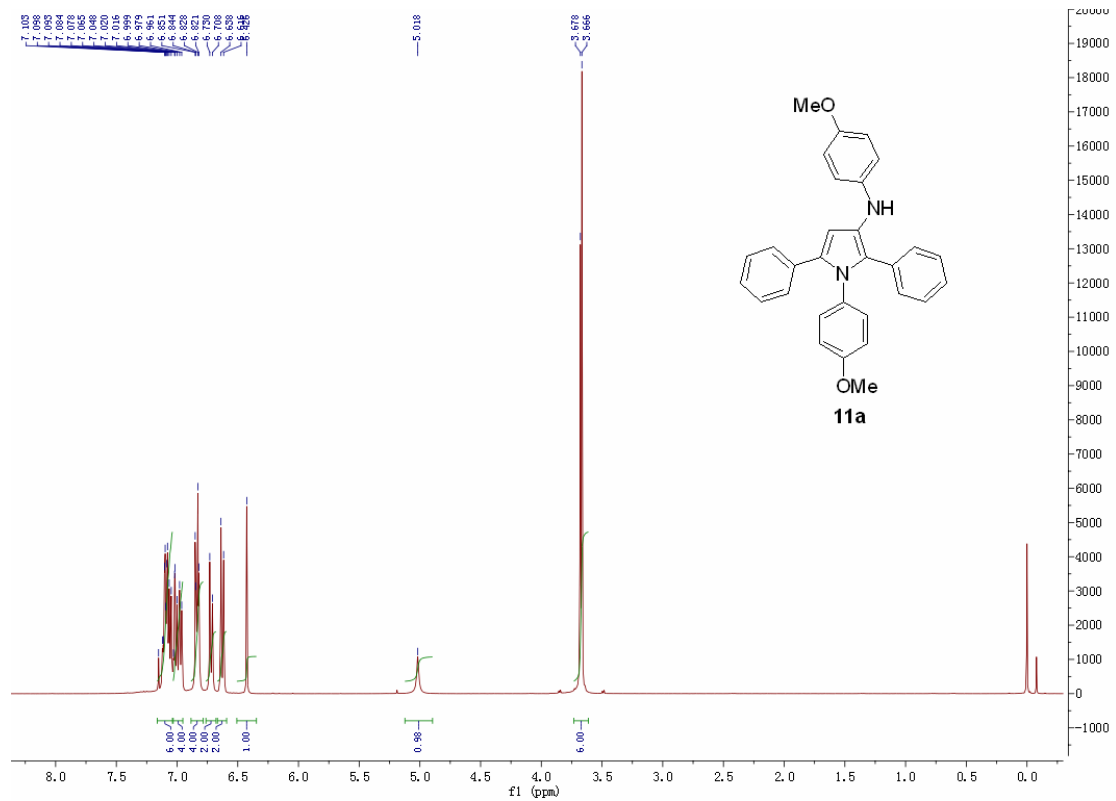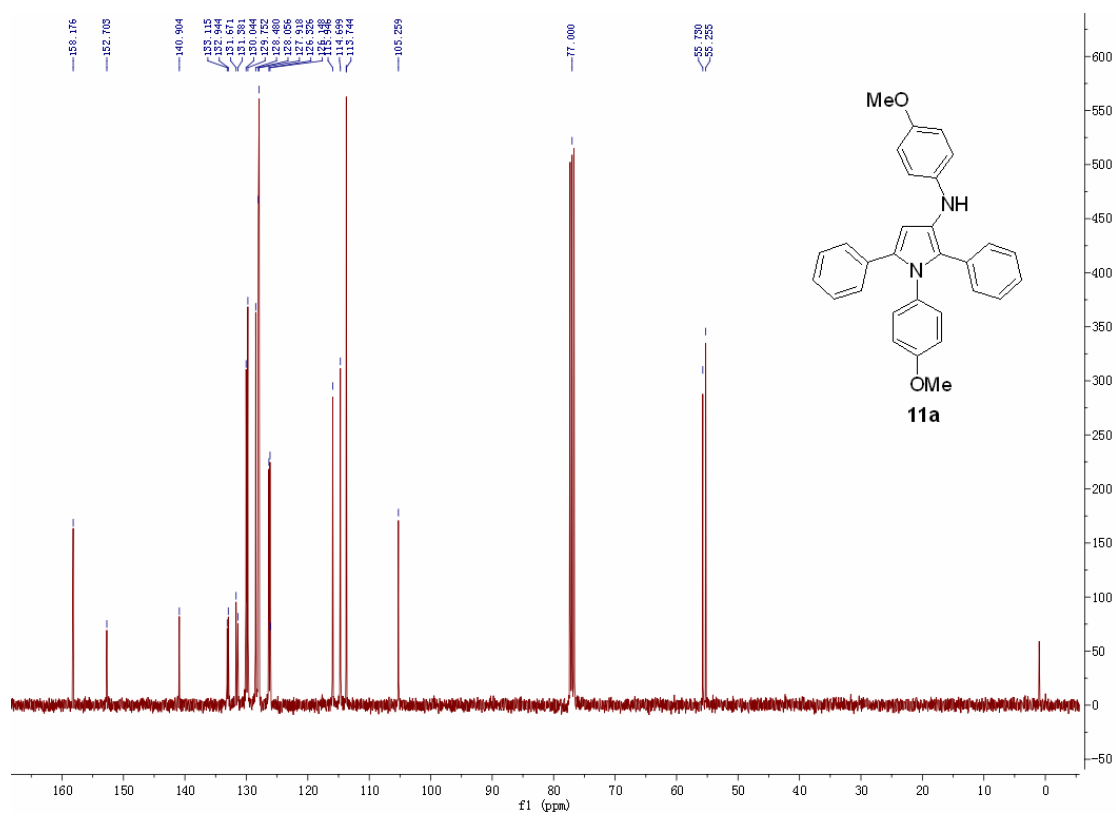

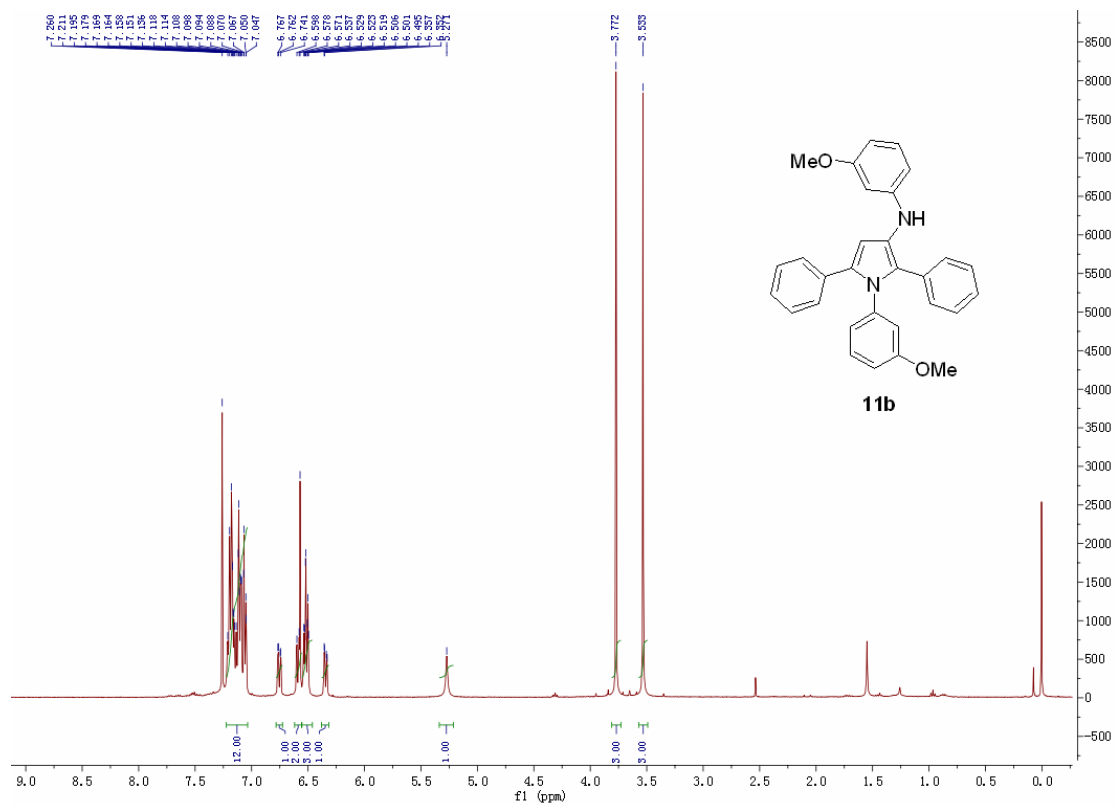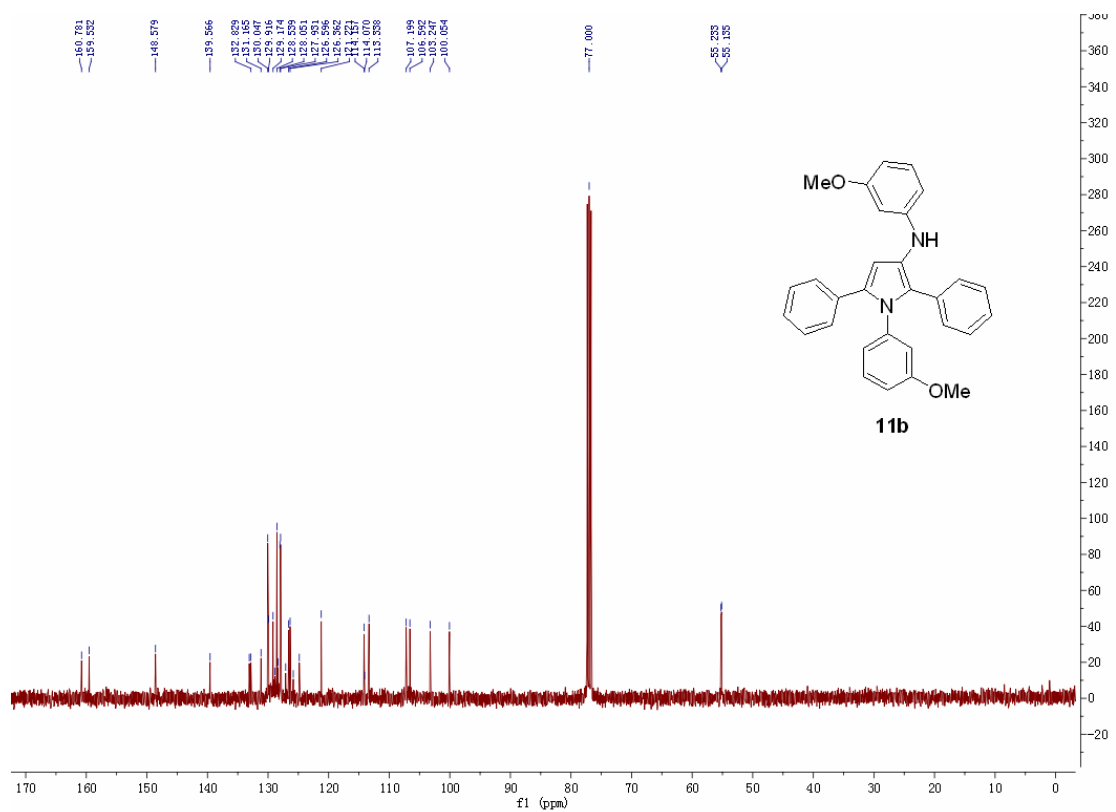



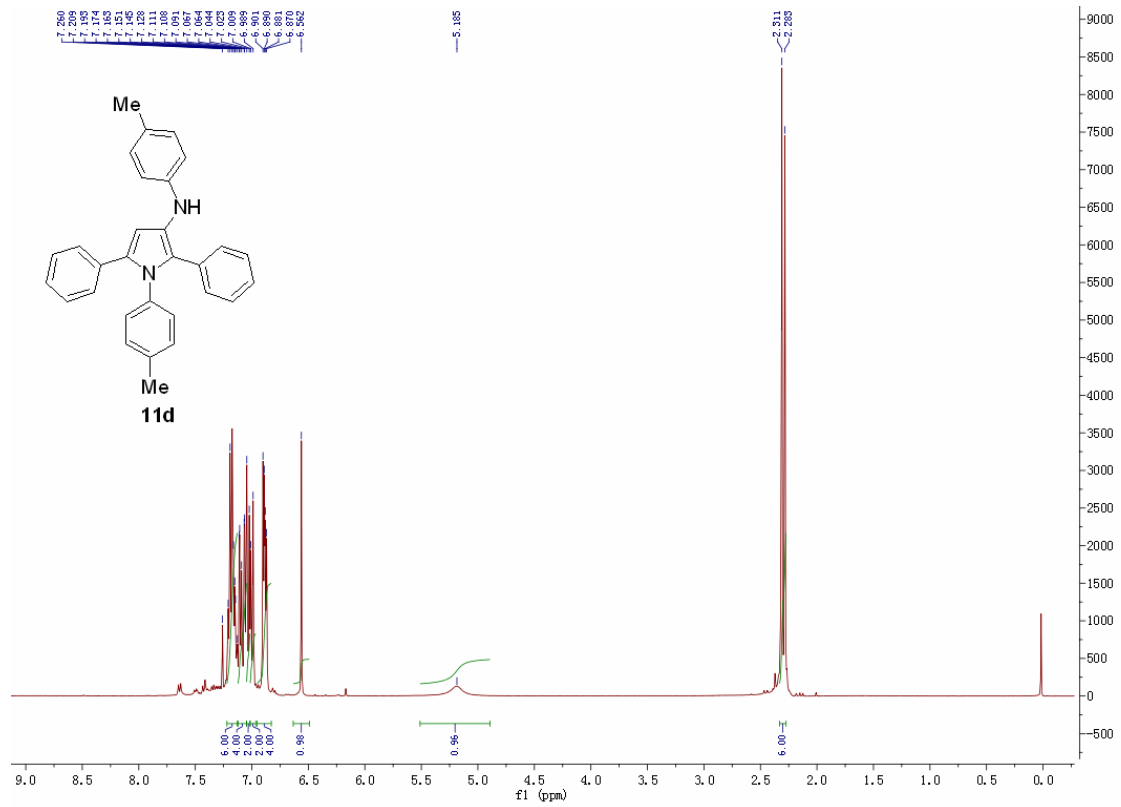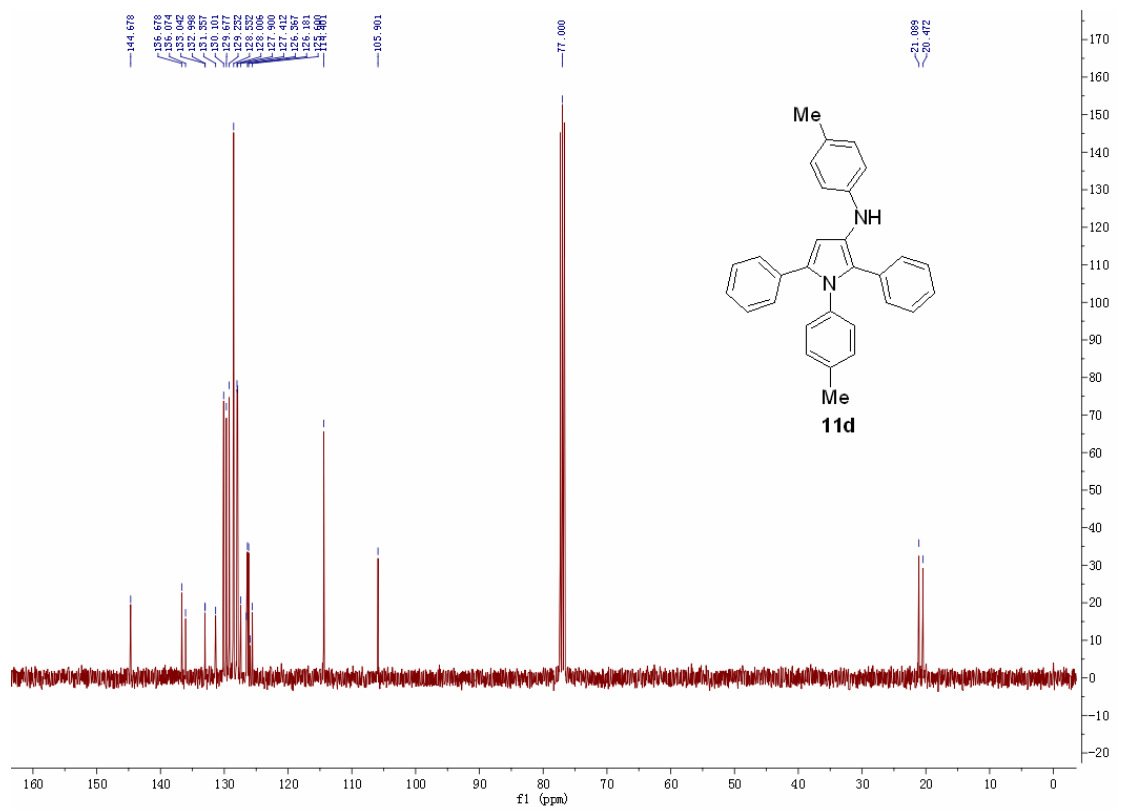

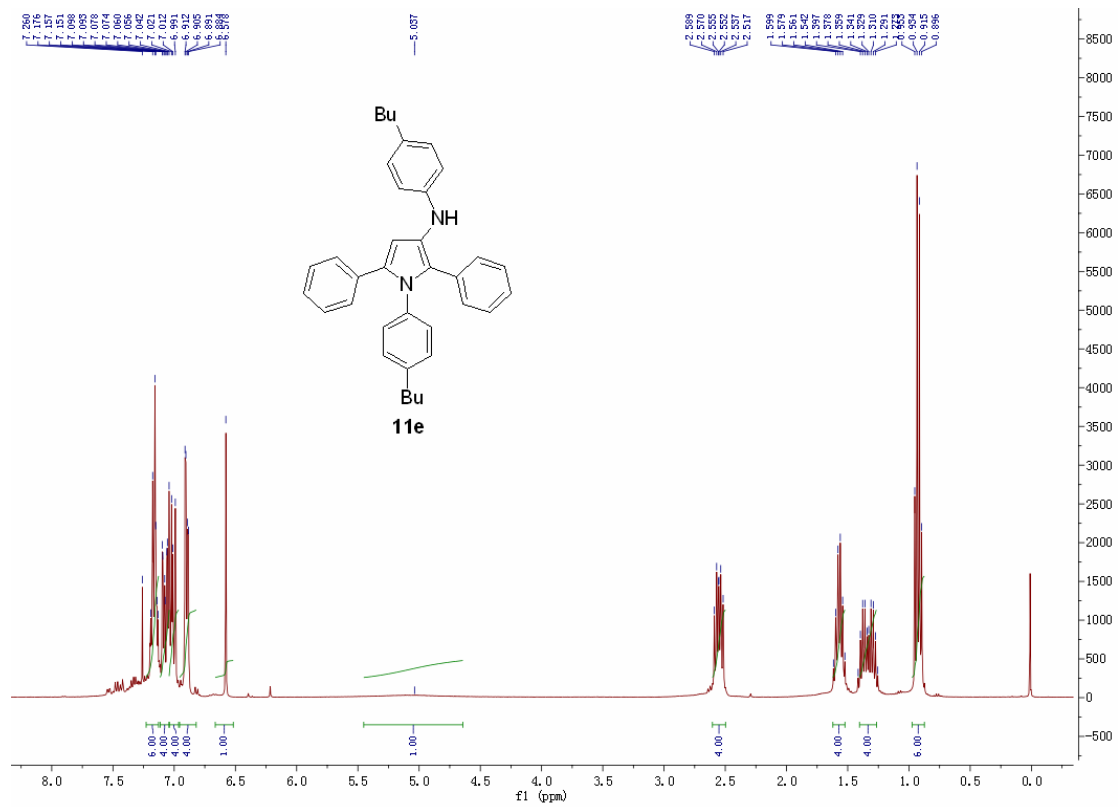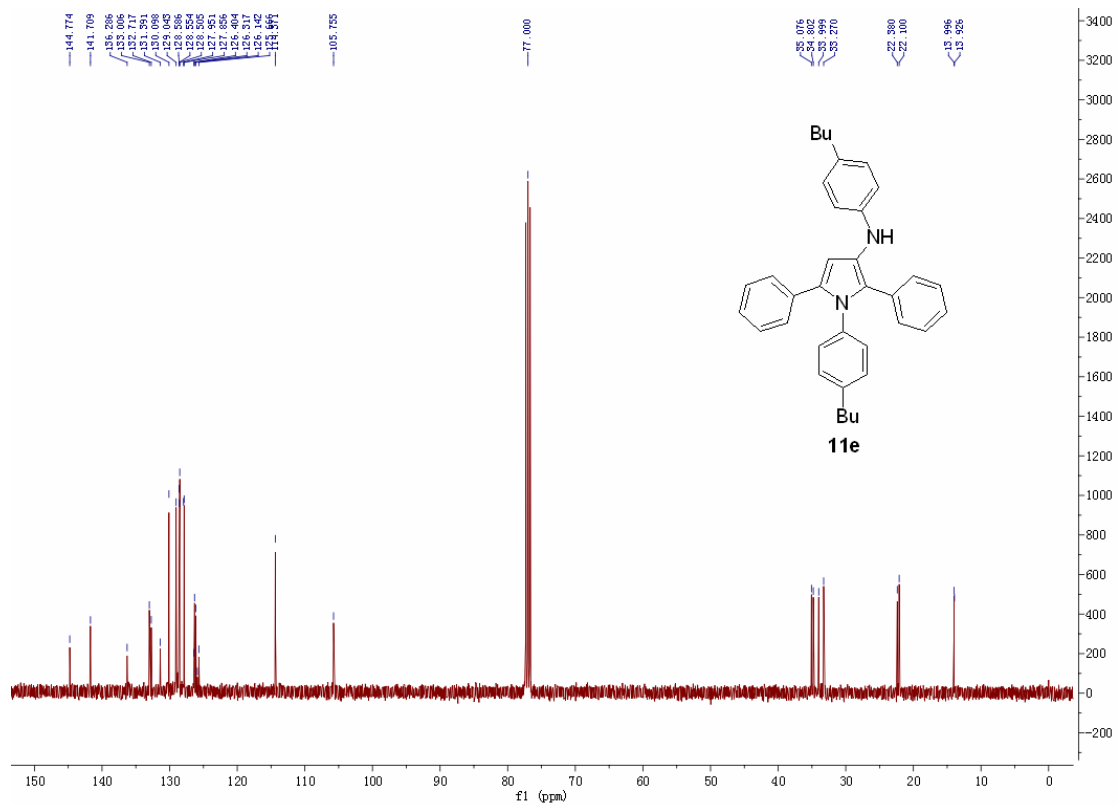

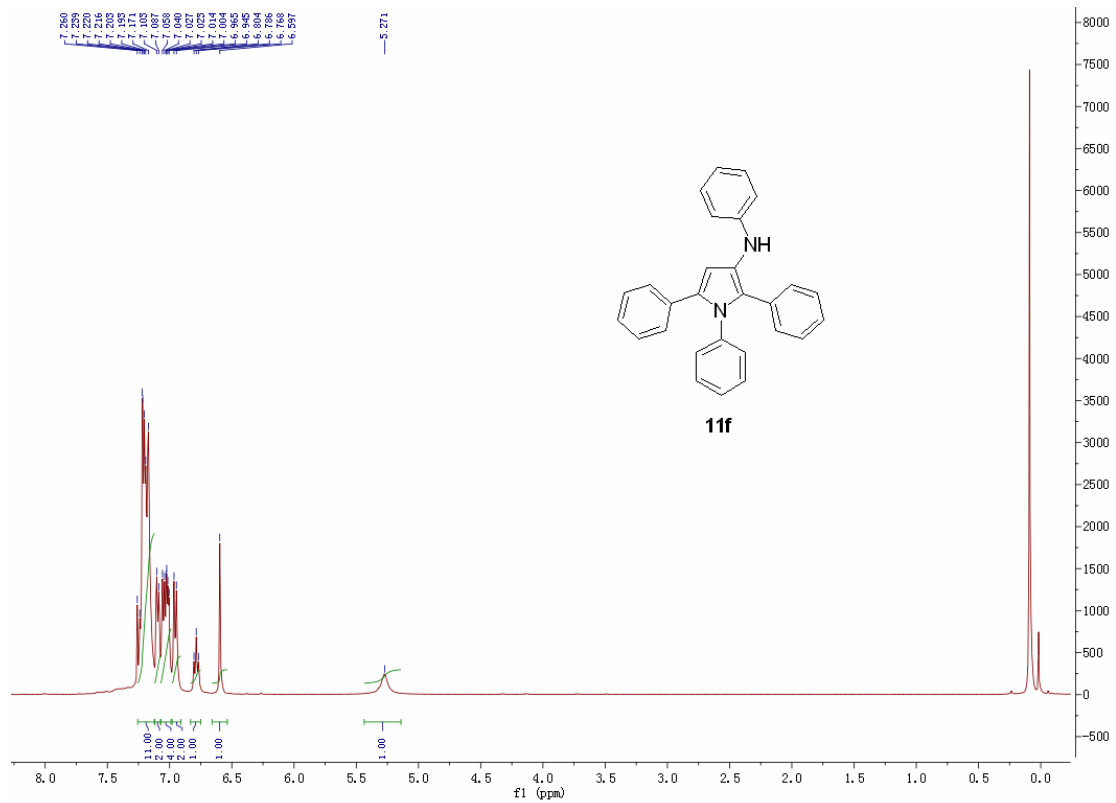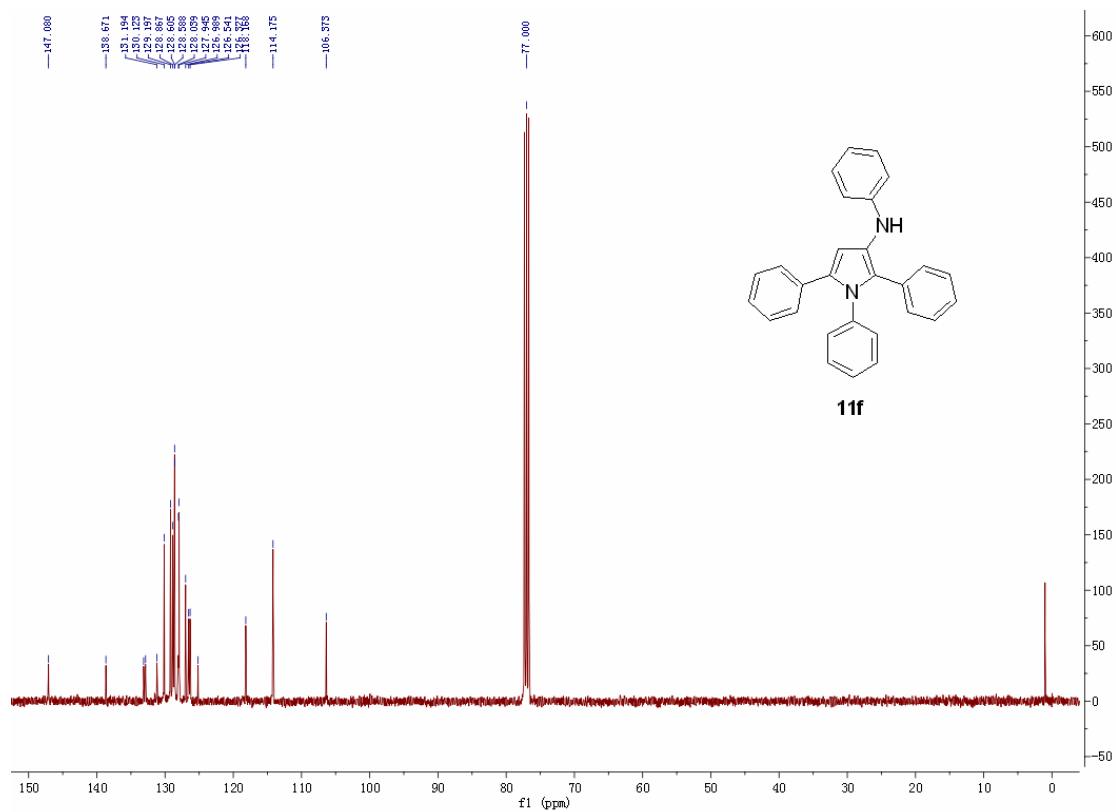



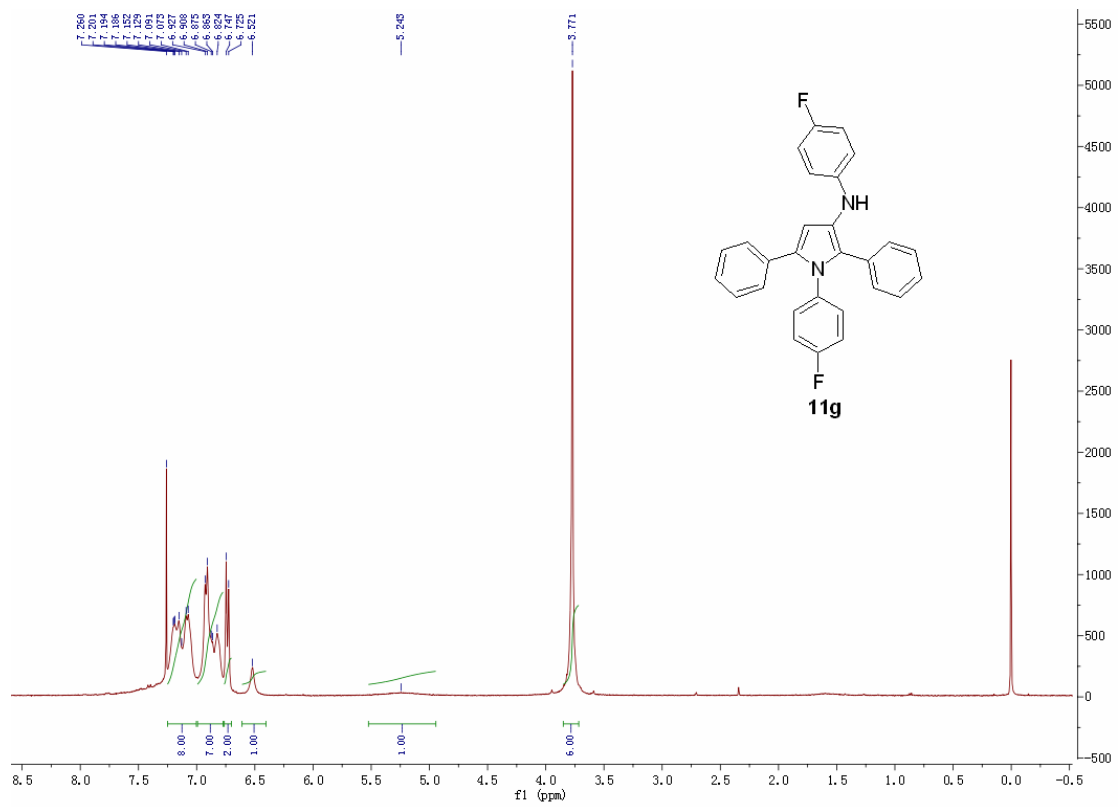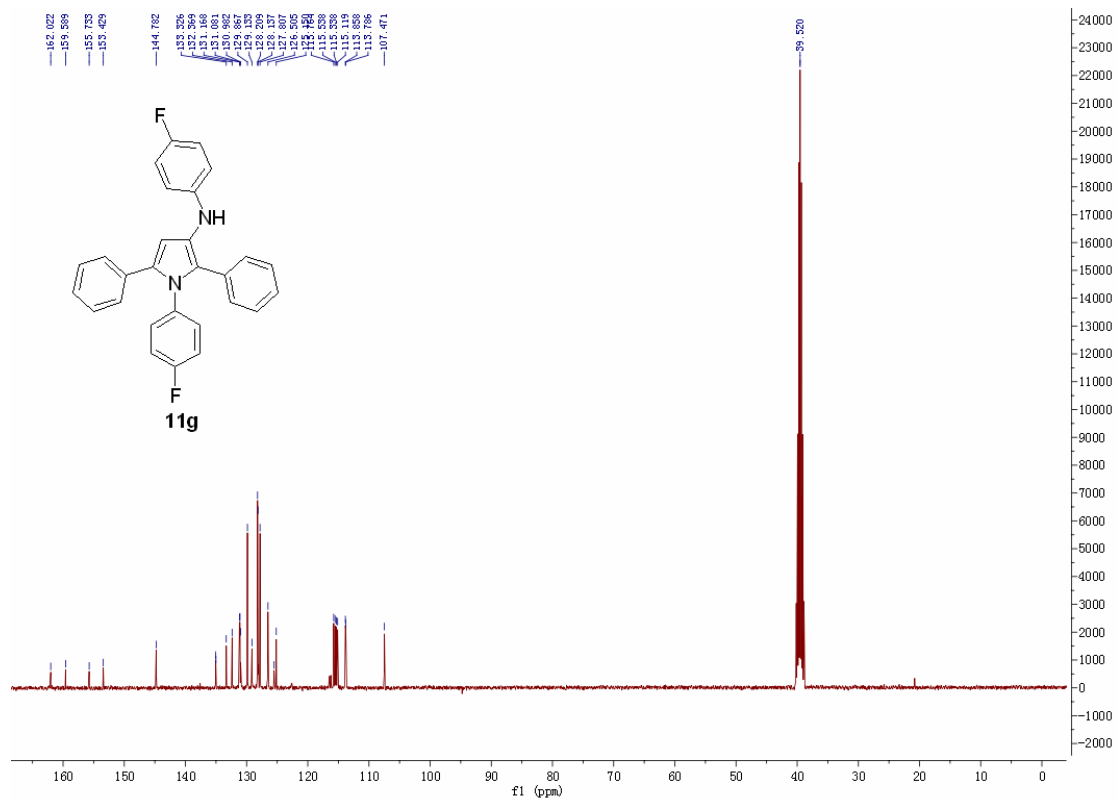

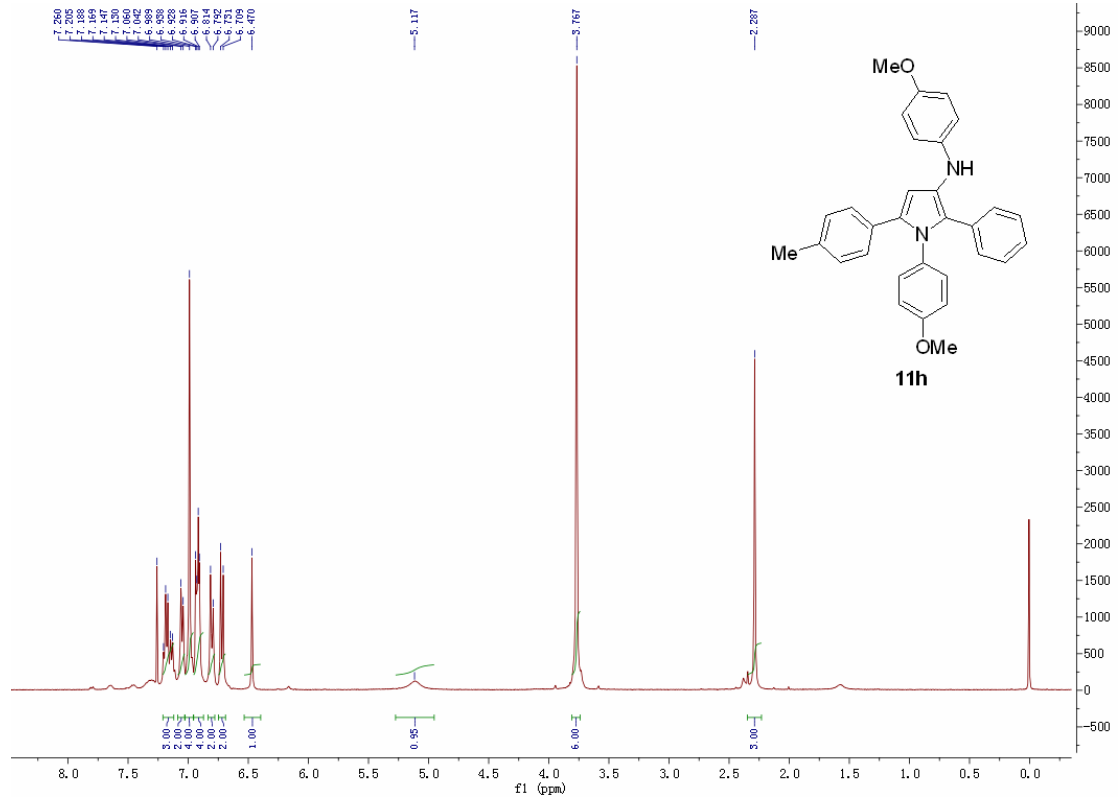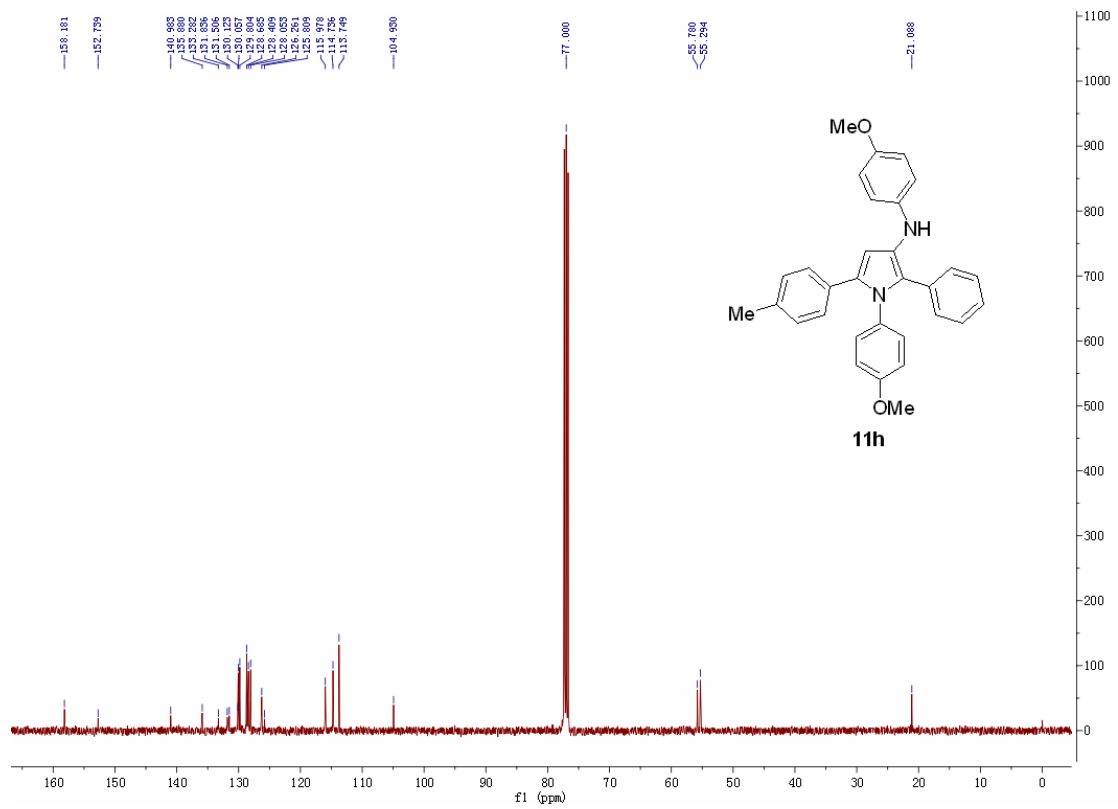

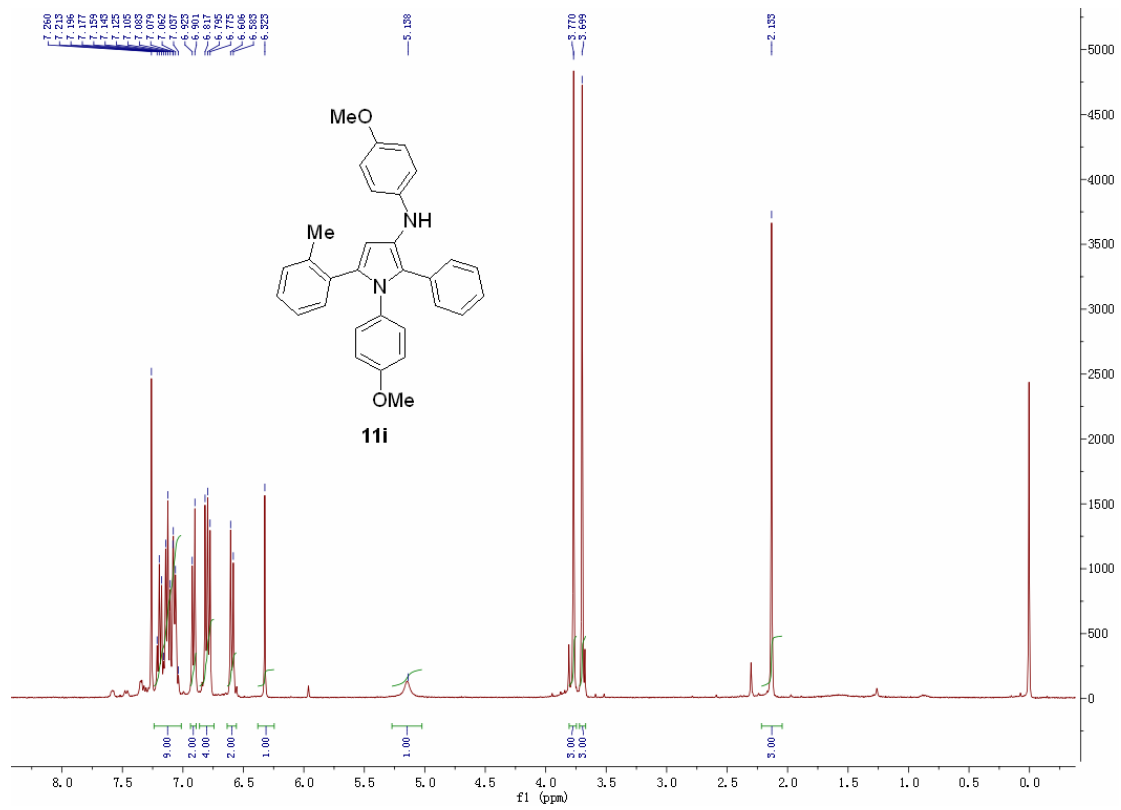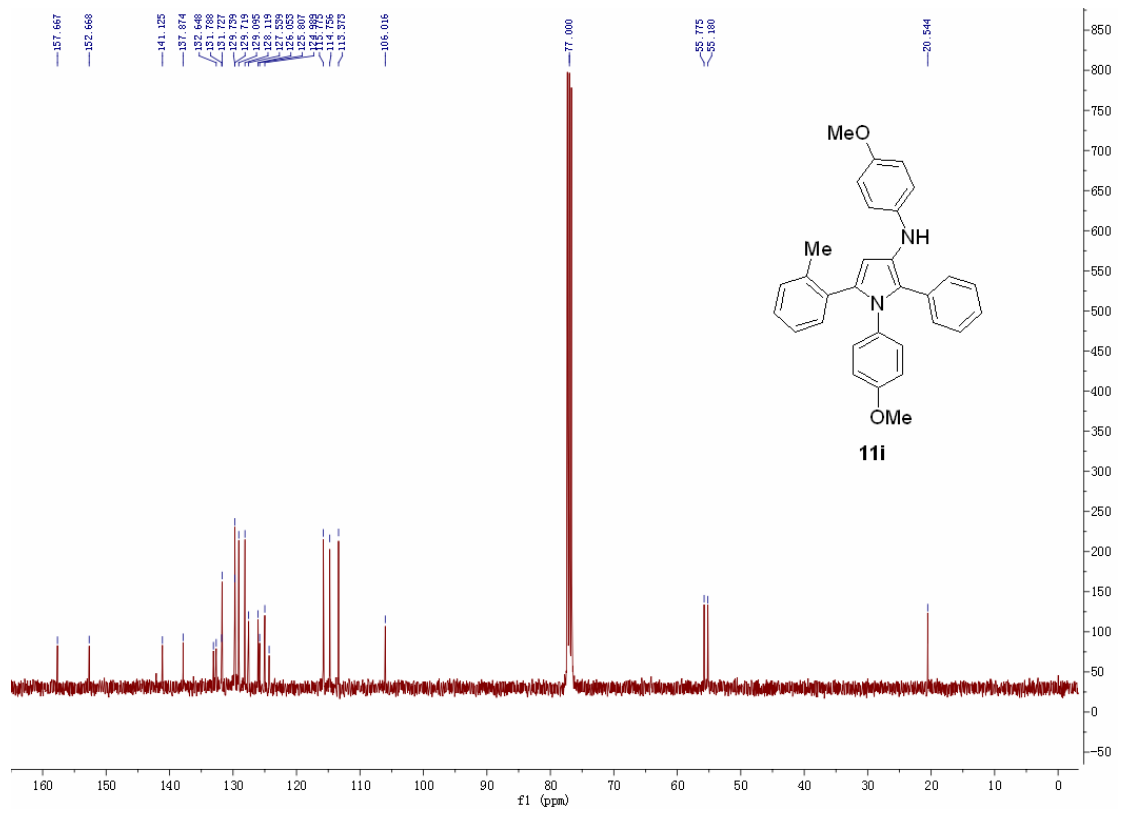

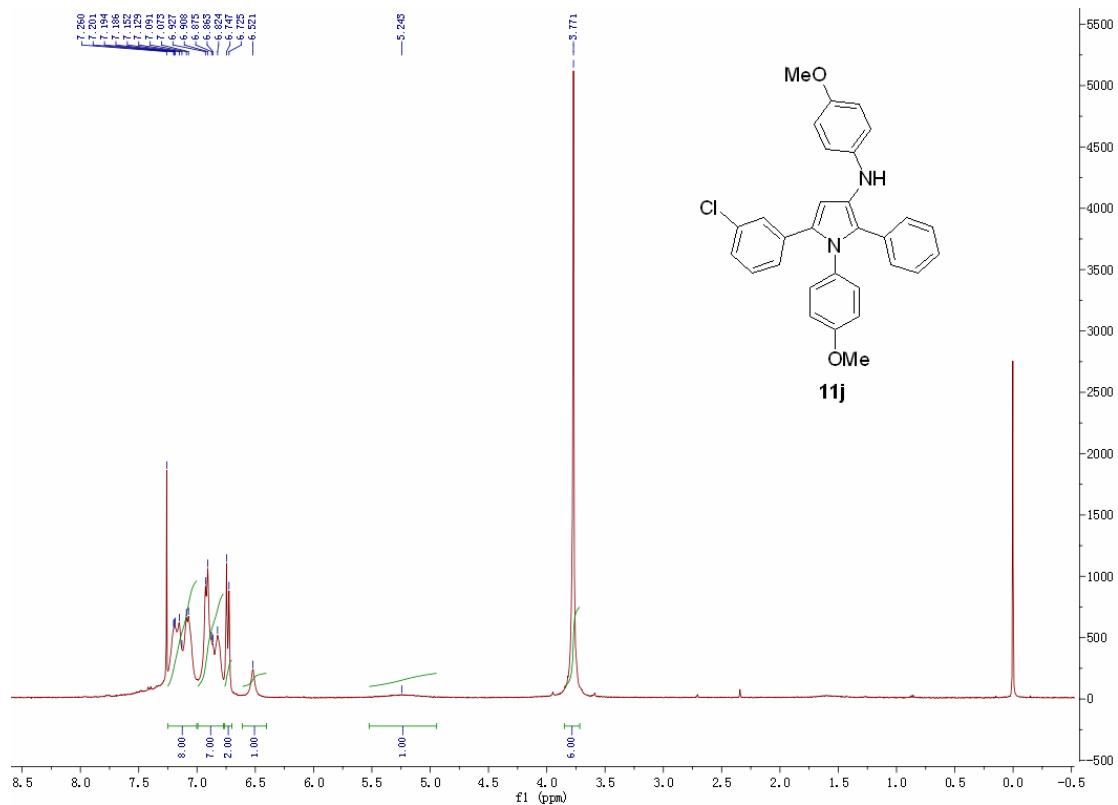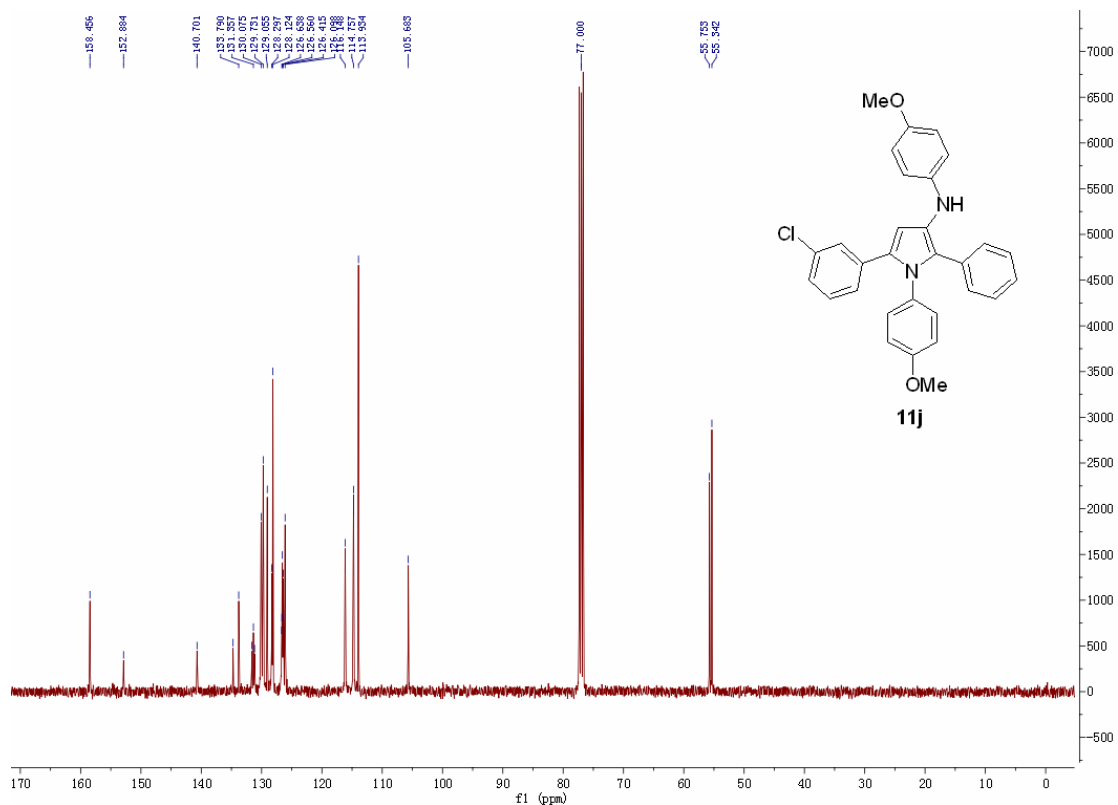

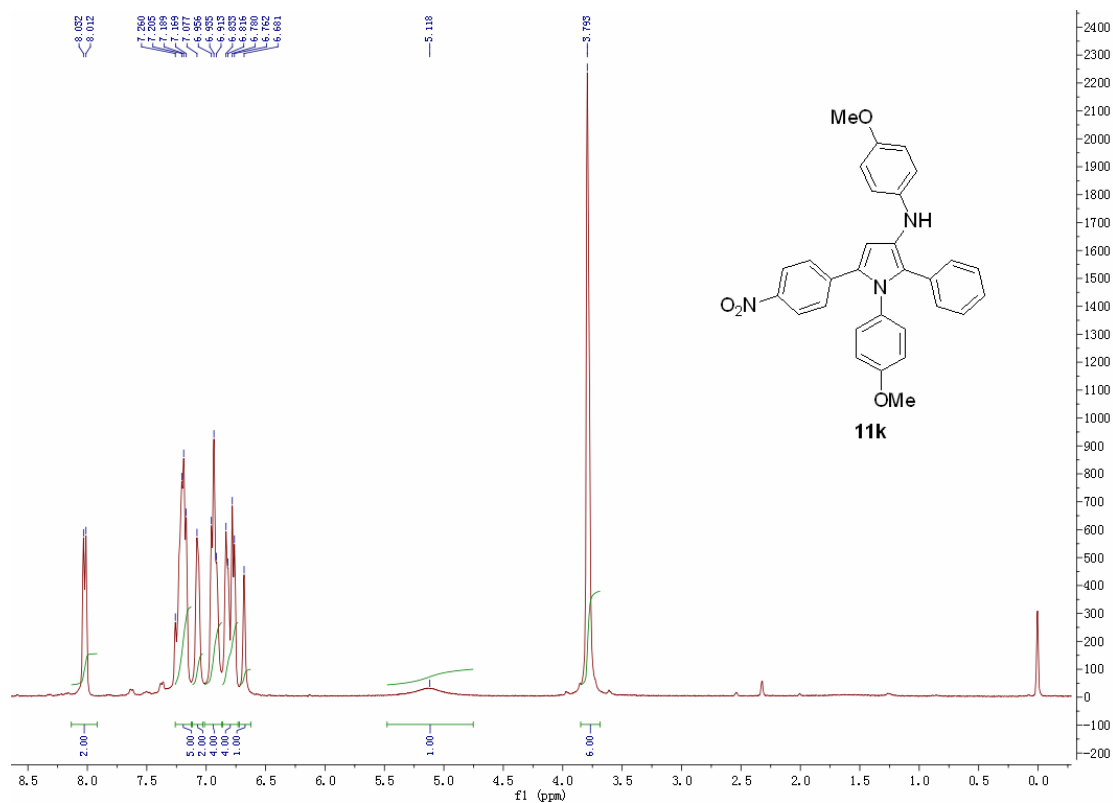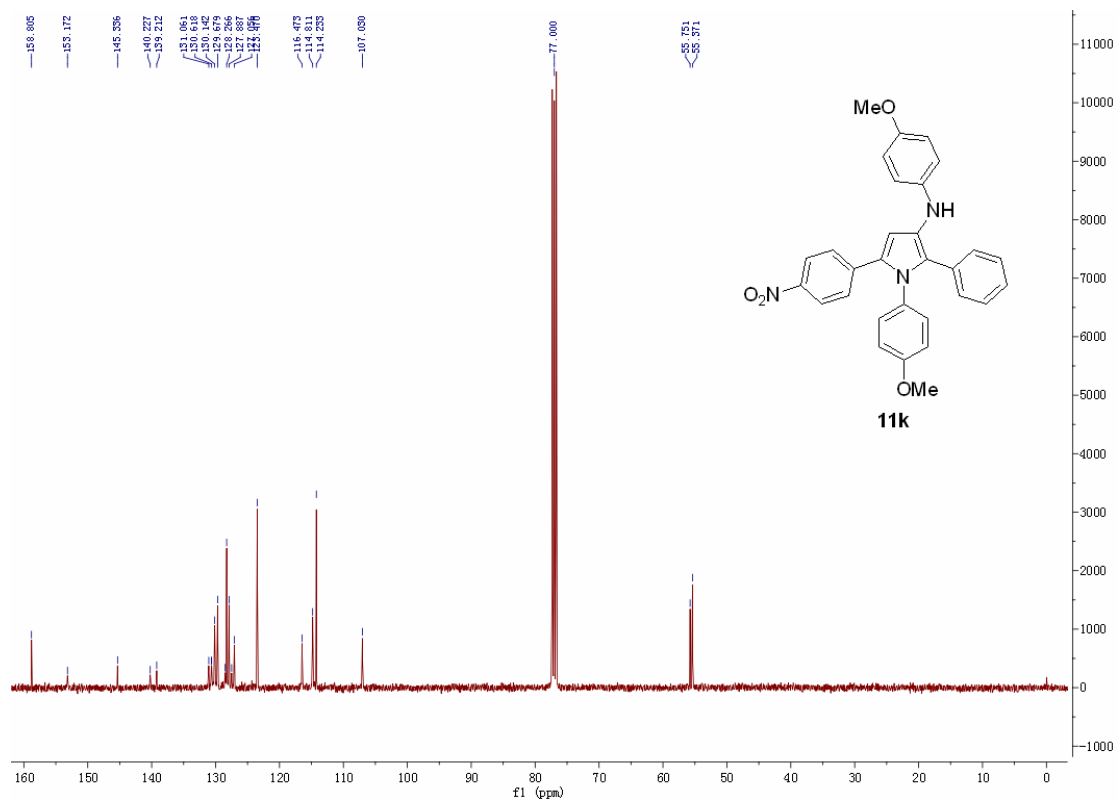

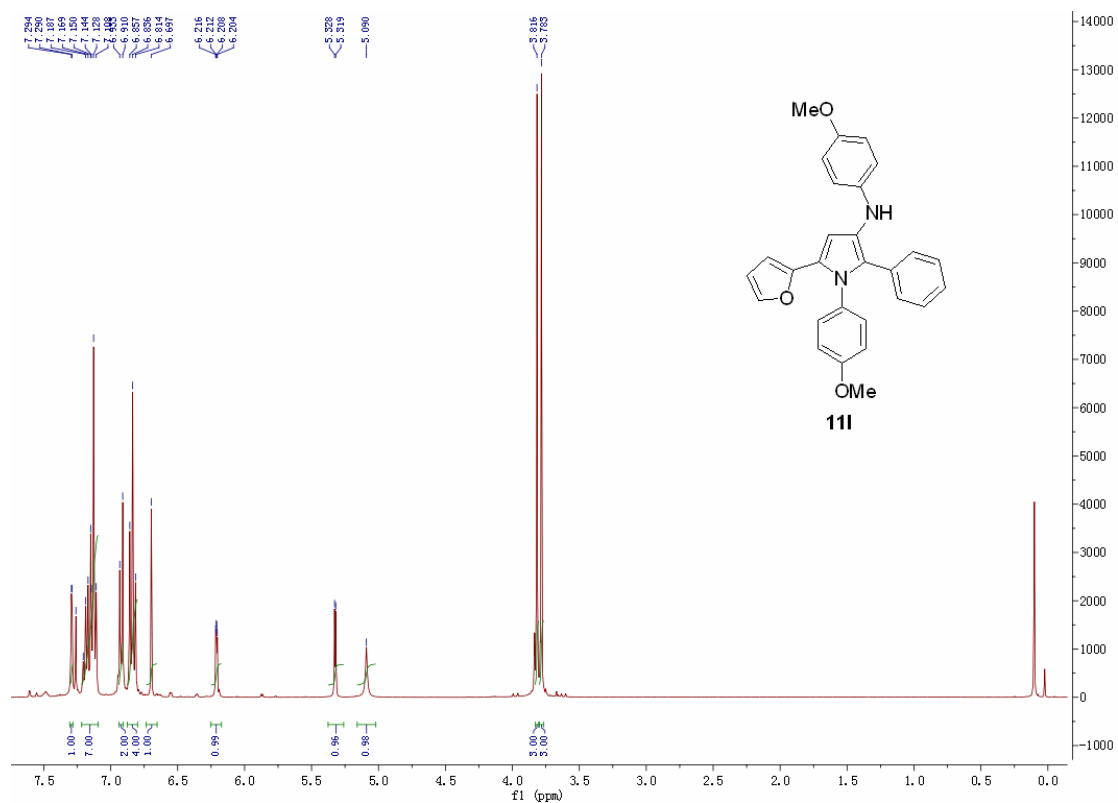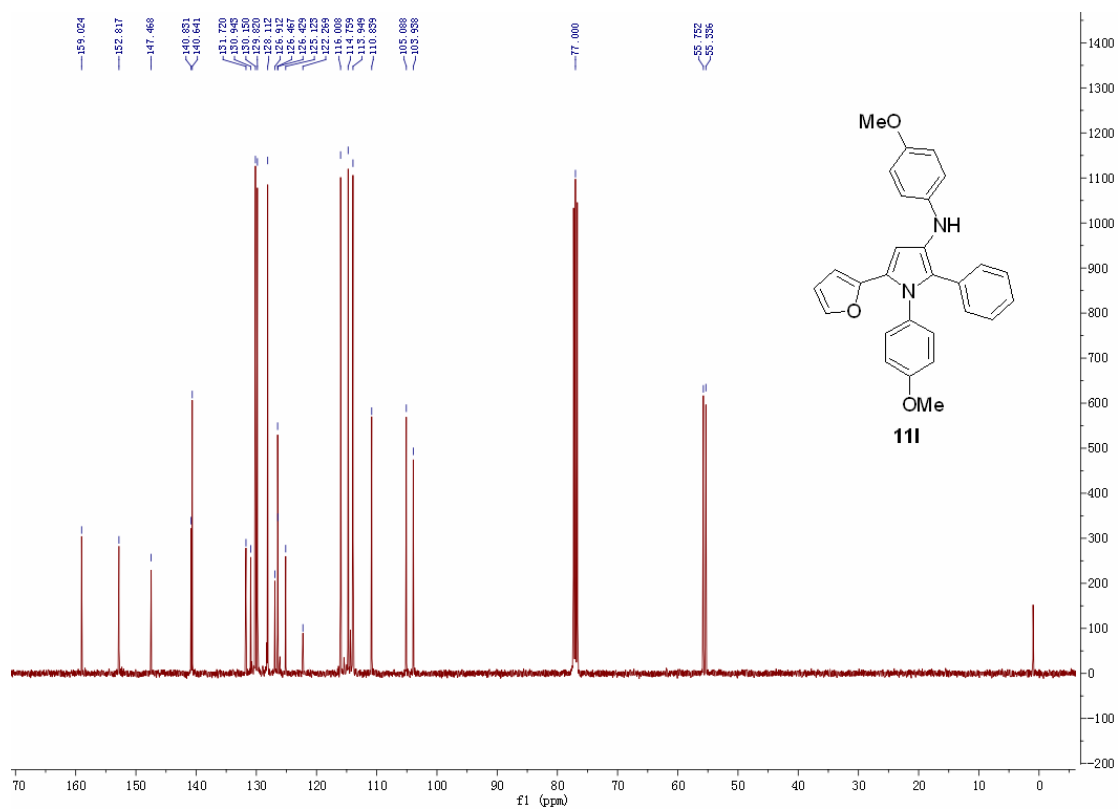

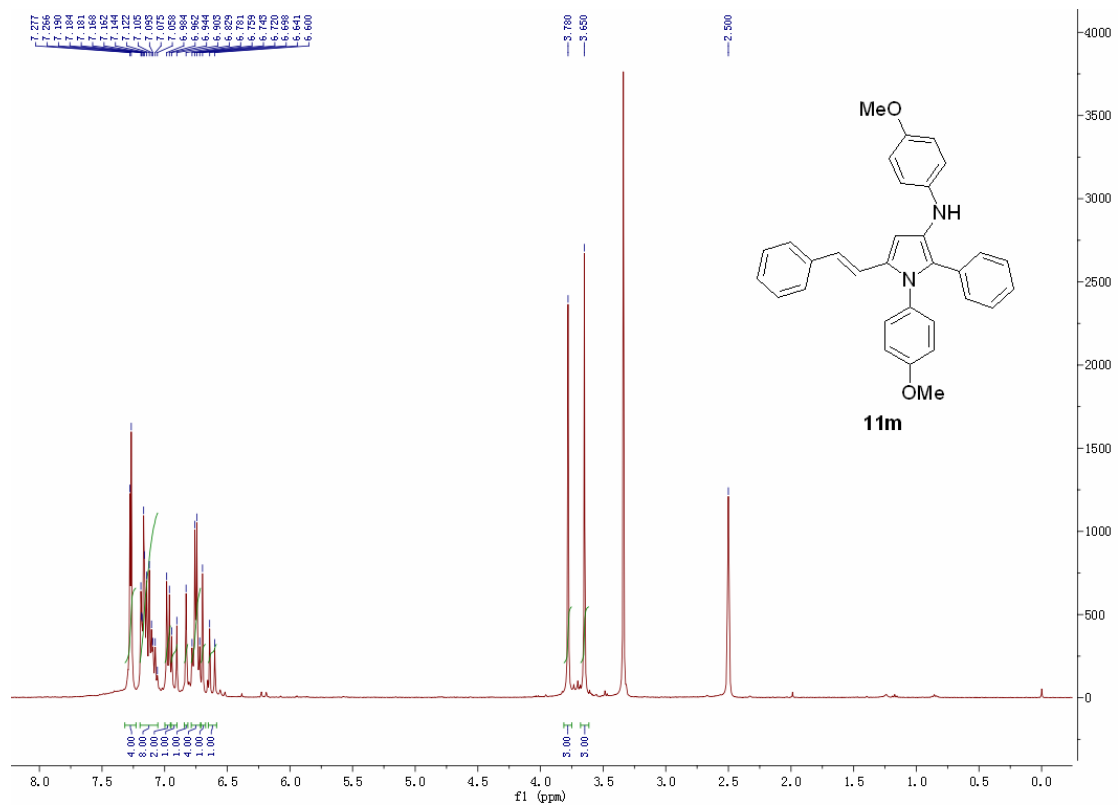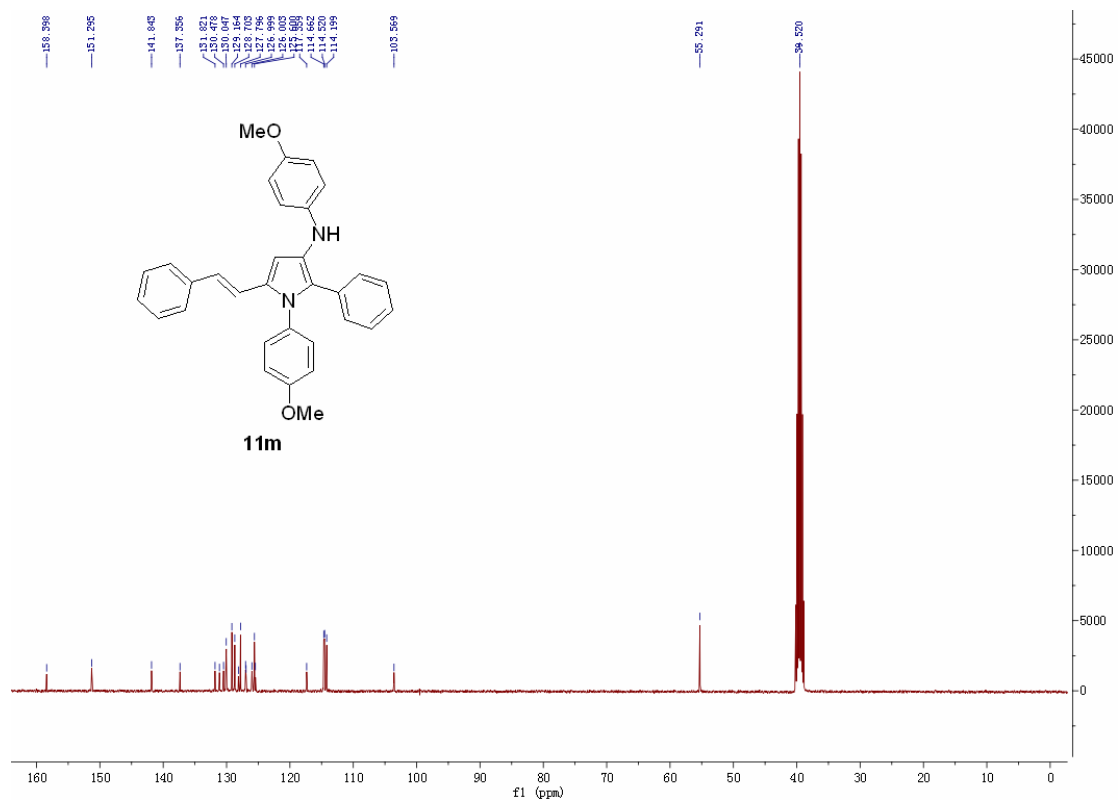

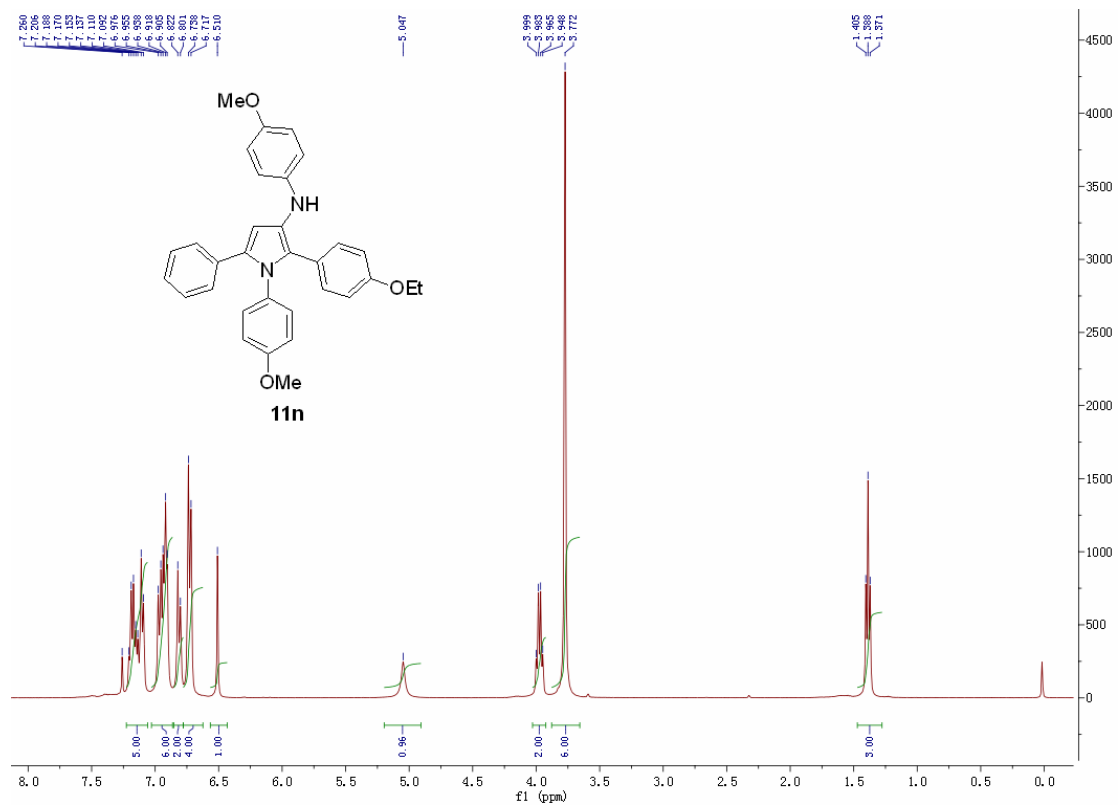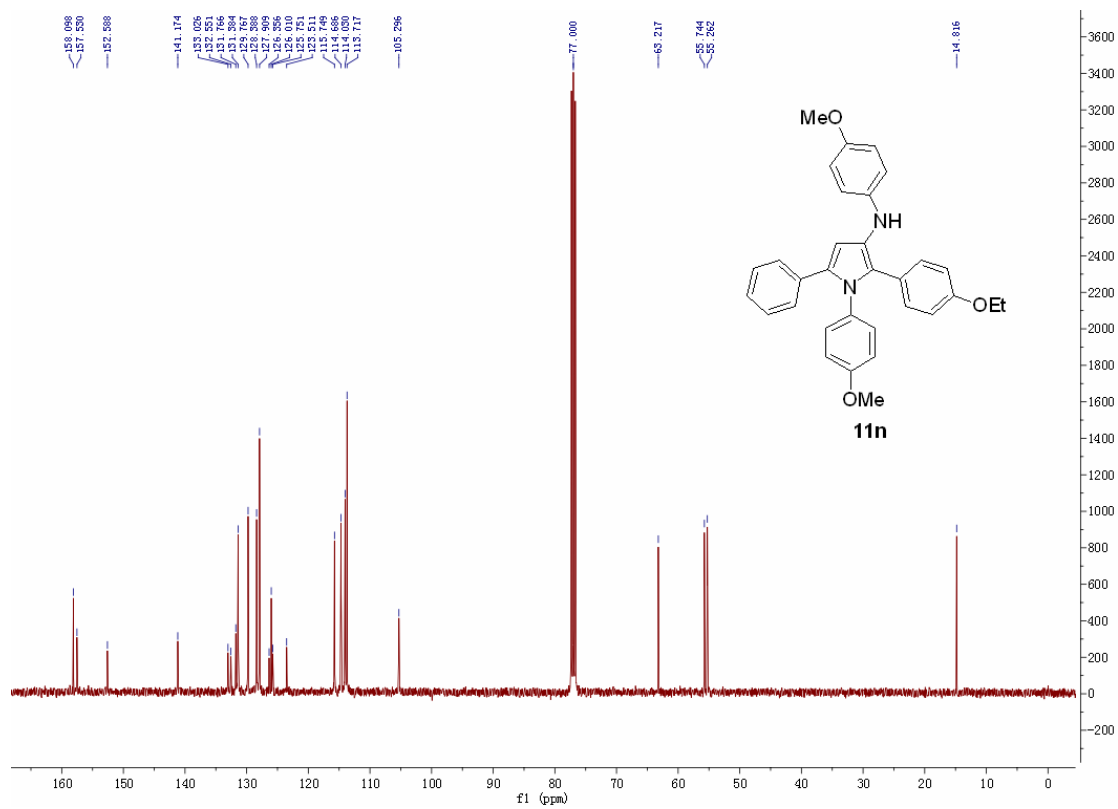



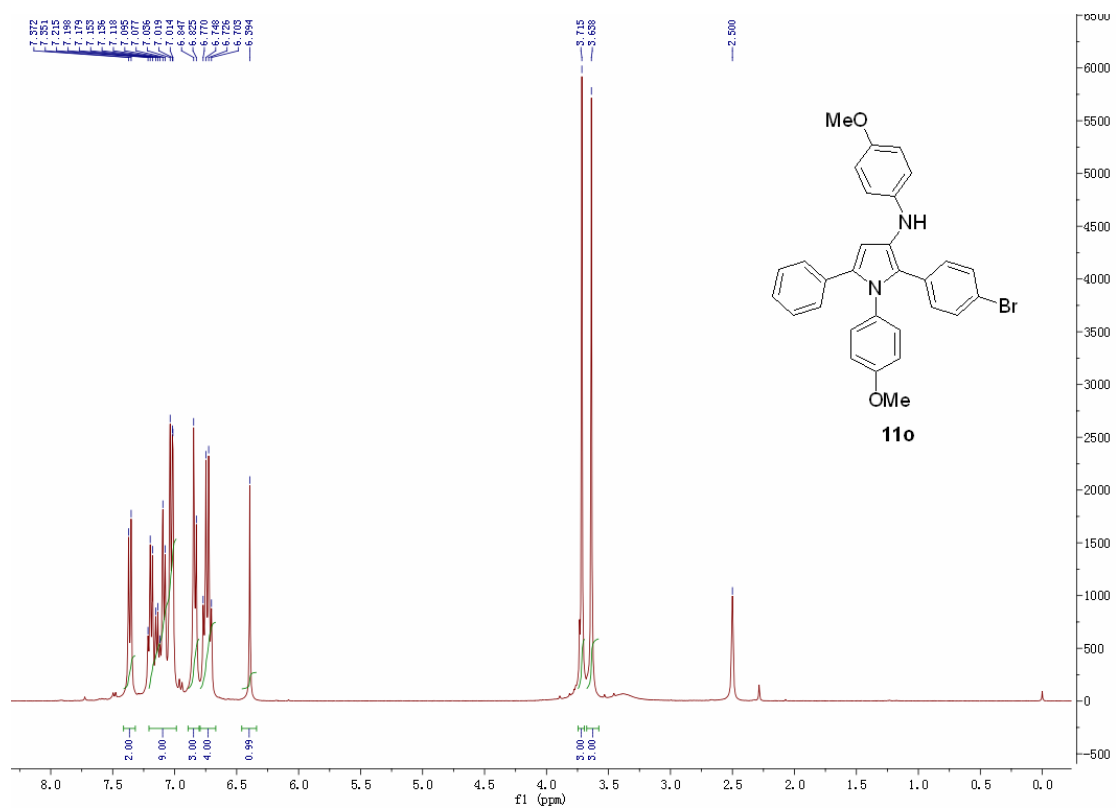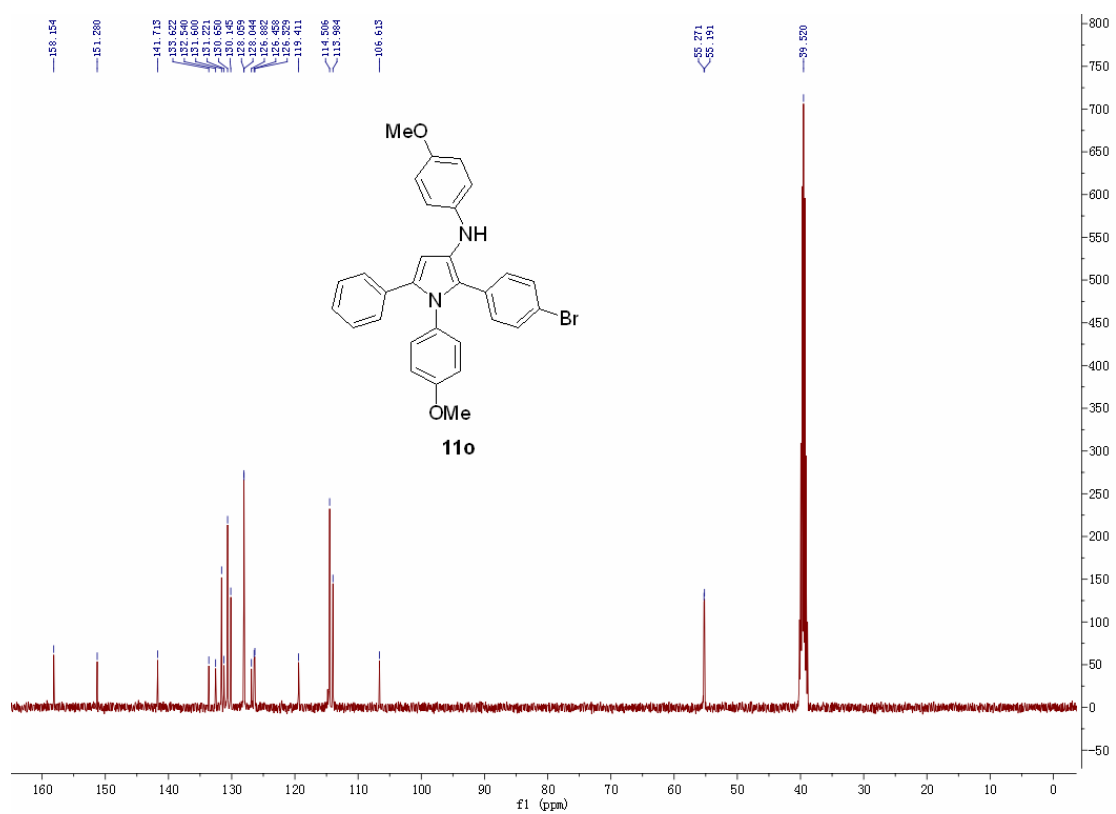

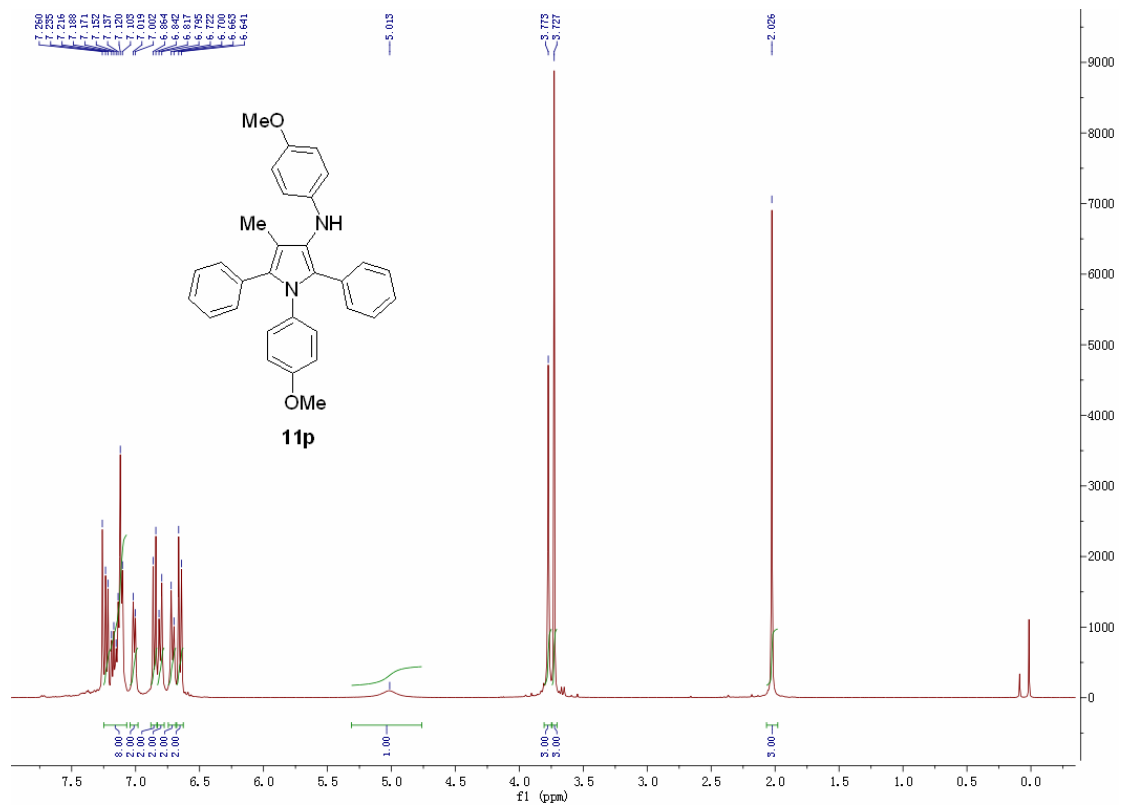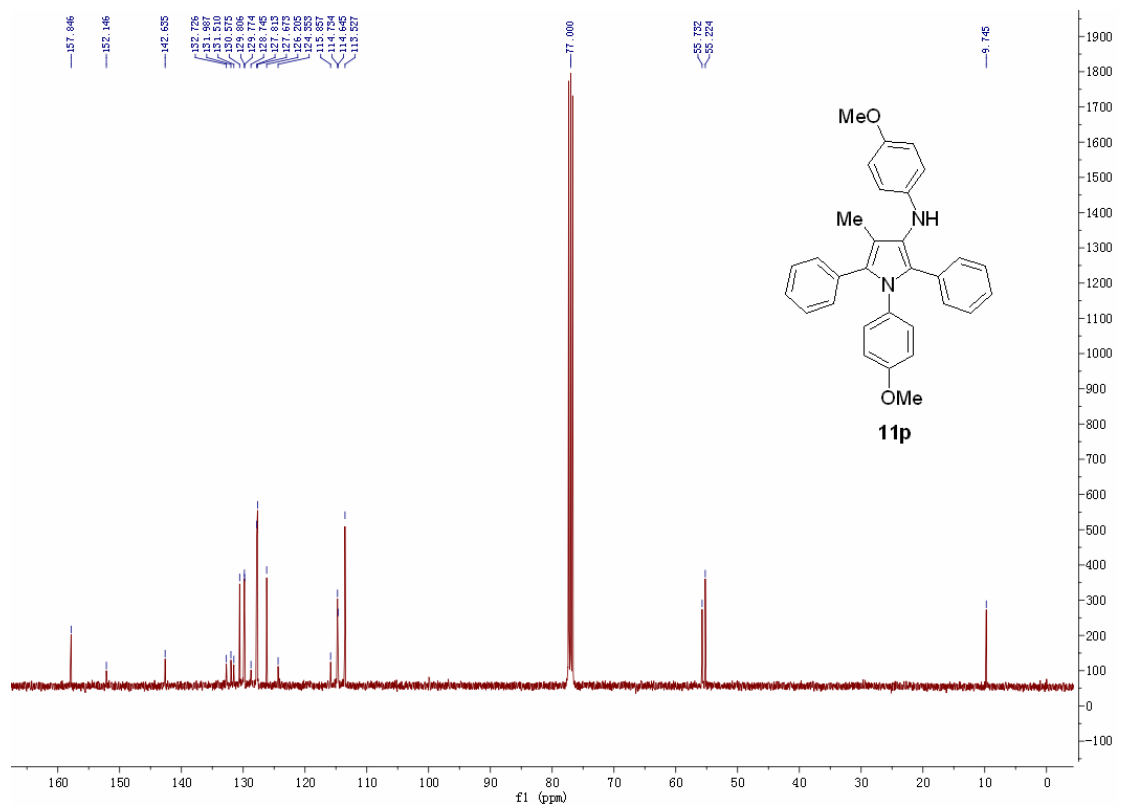

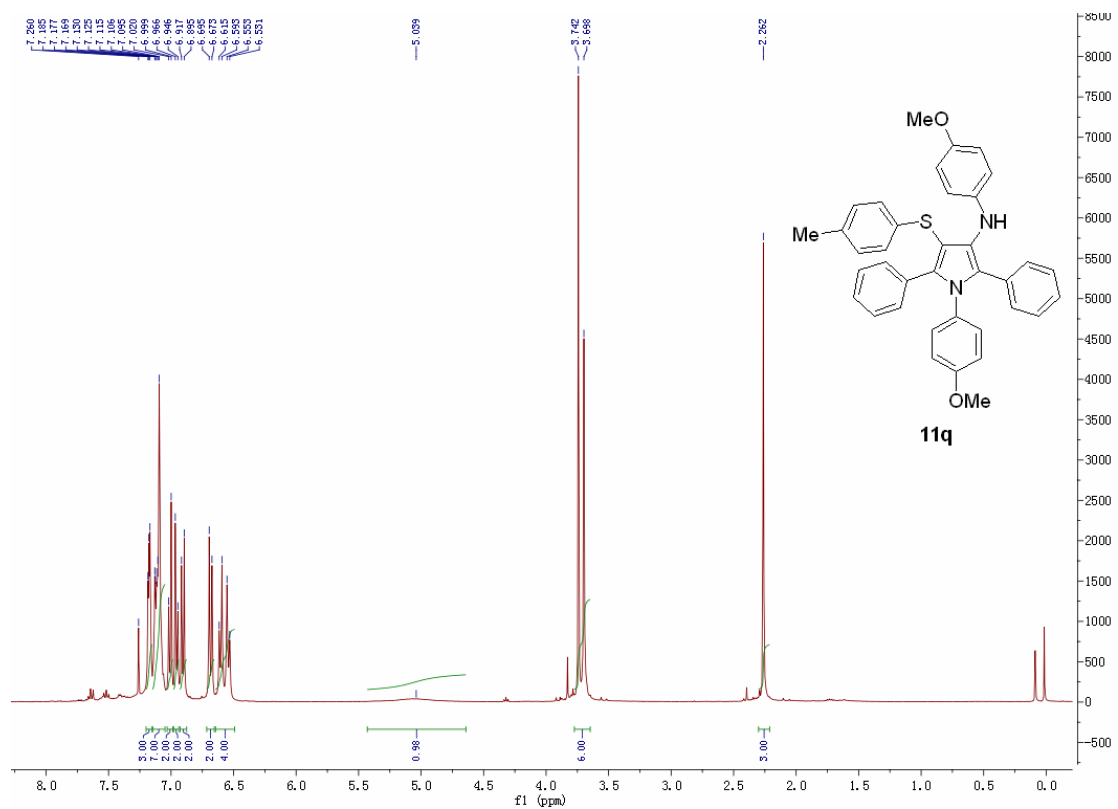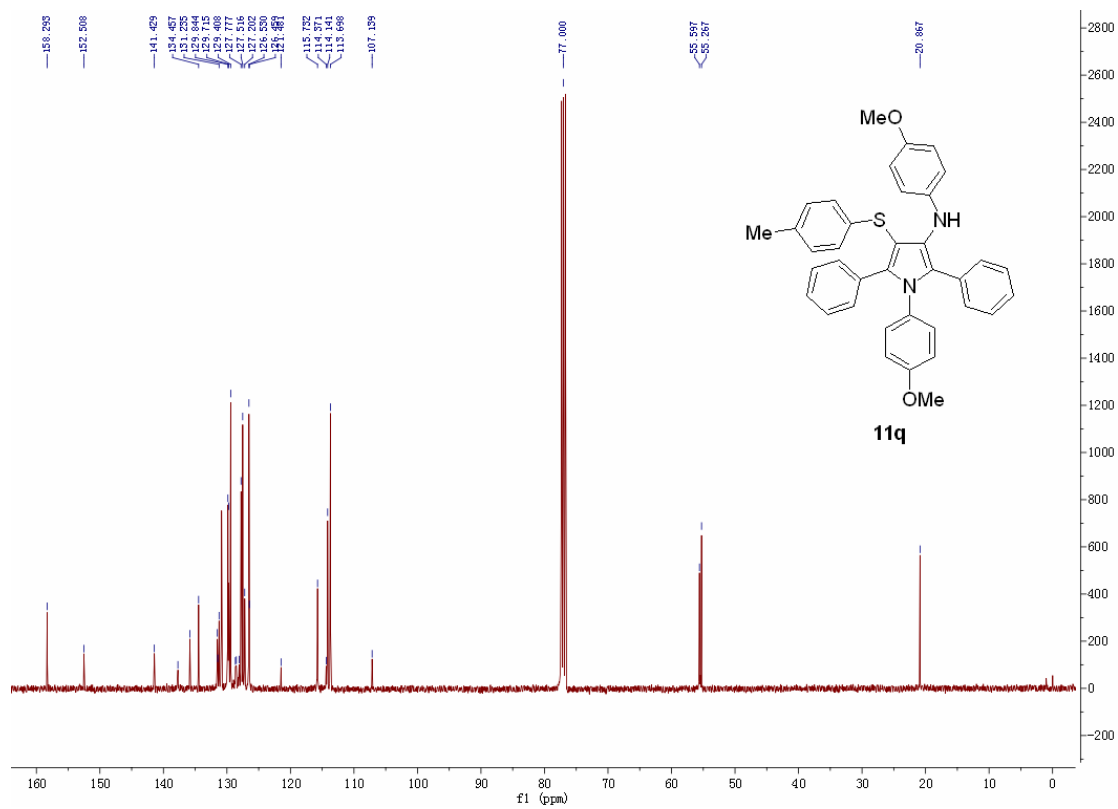

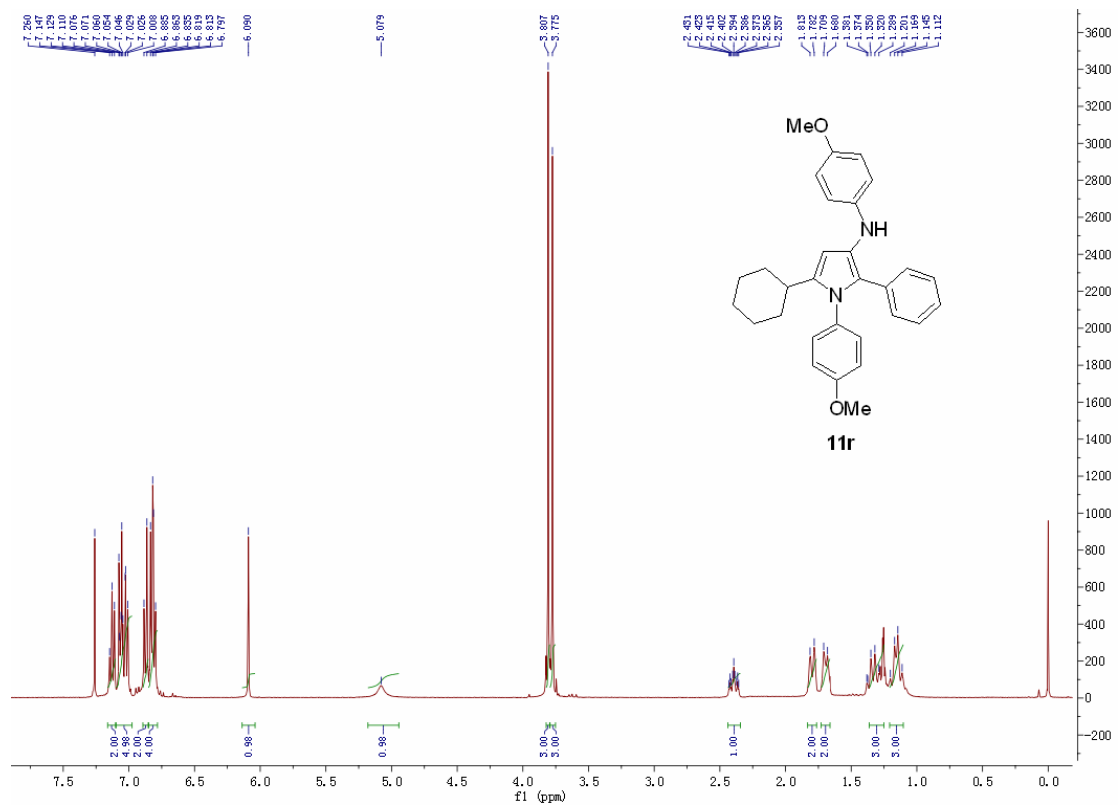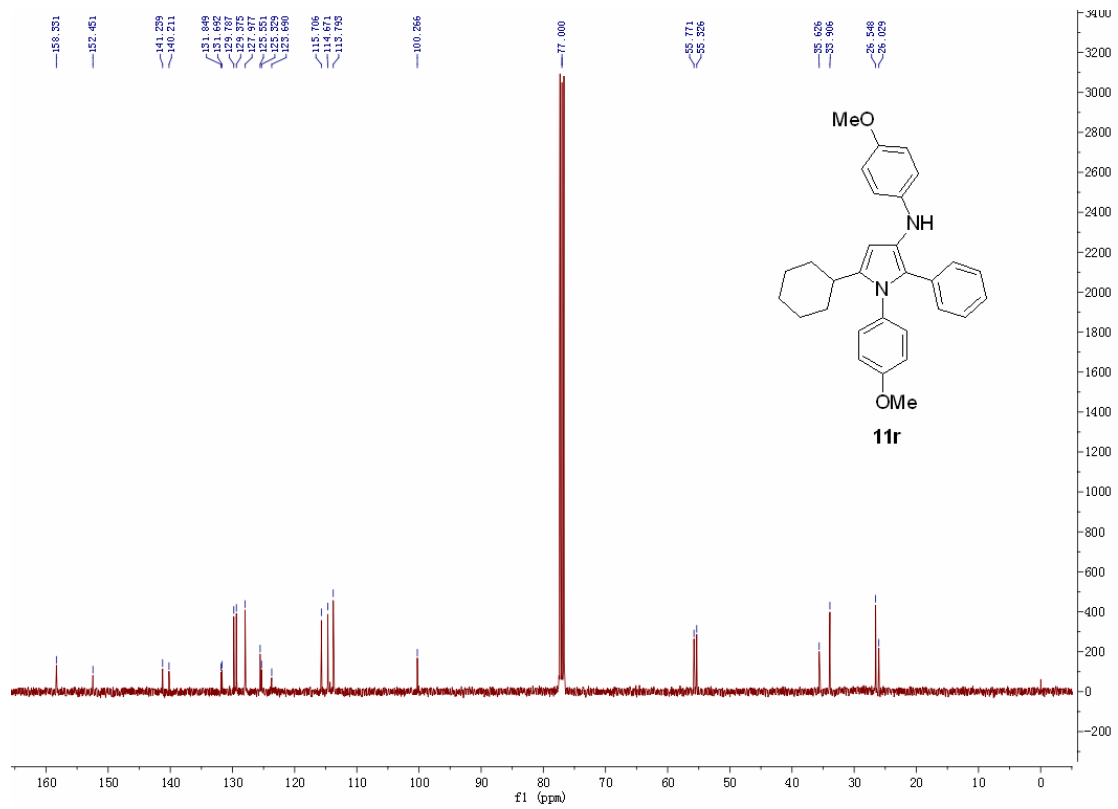

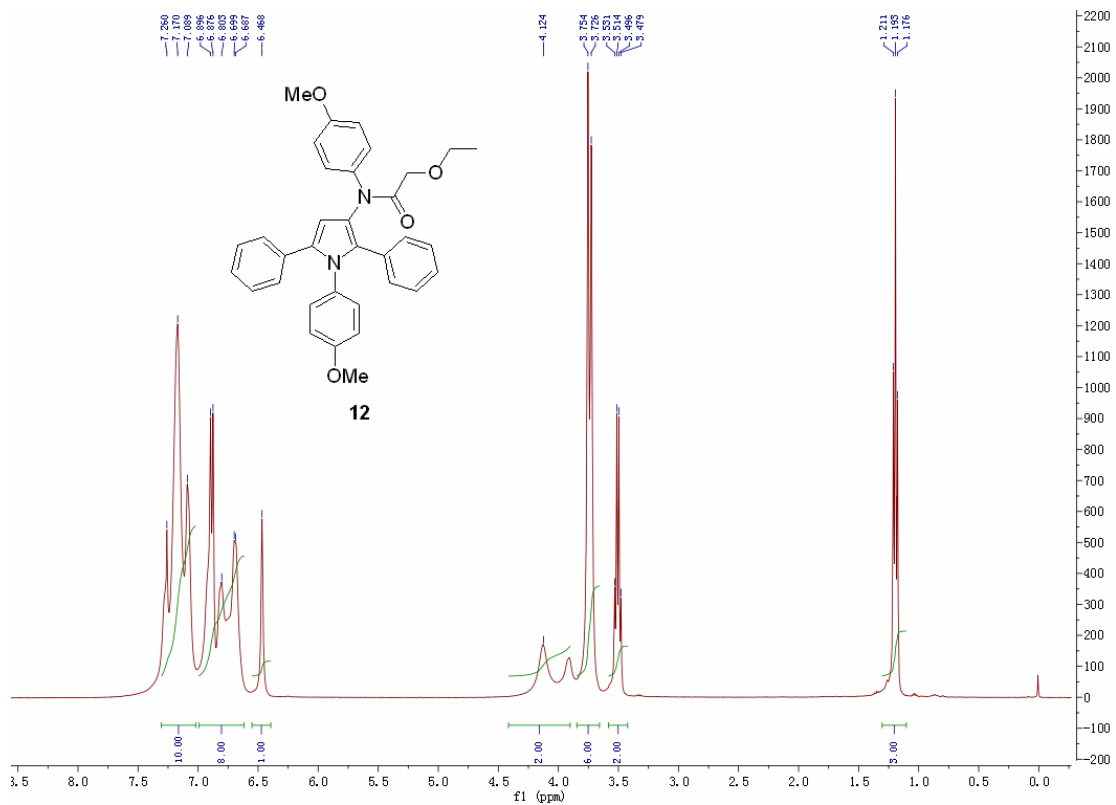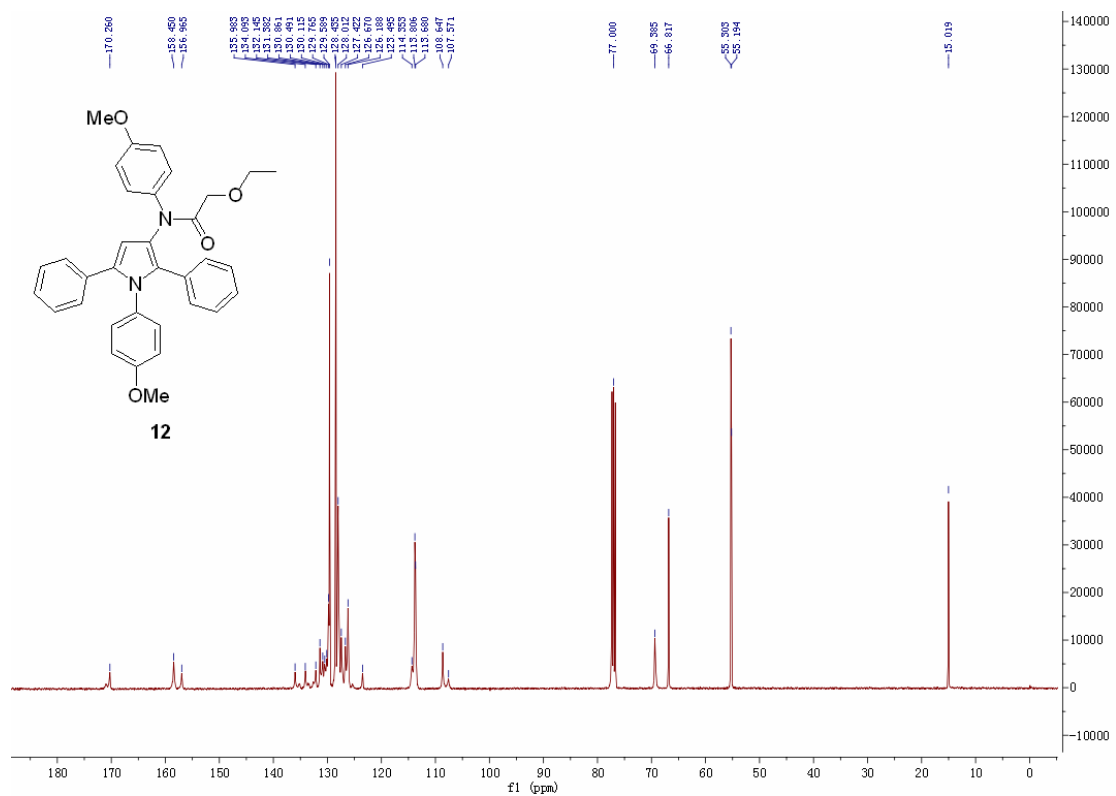

## 4. Copies of HRMS Spectra

Varian ProMALDI  
File: ZY1124CP01(2)\_MALDI.trans

Mode: Positive  
Scans: 1  
Date: 25-NOV-2014  
Time: 11:57:27  
Scale: 13.4429

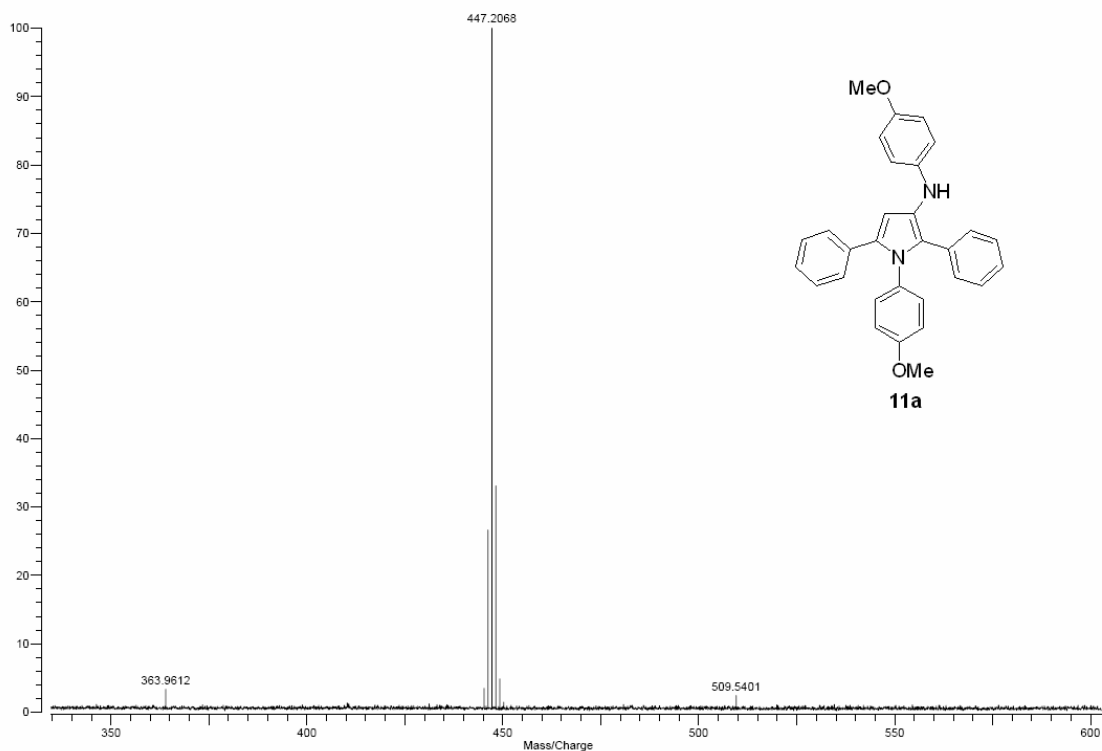

| Sample Name   | A6            | Position    | P1-A6     | Instrument Name | Instrument 1 | User Name              |                       |
|---------------|---------------|-------------|-----------|-----------------|--------------|------------------------|-----------------------|
| Inj Vol       | -1            | InjPosition |           | SampleType      | Sample       | IRM Calibration Status | Some Ions Missed      |
| Data Filename | ZY150302-02.d | ACQ Method  | chen-ms.m | Comment         |              | Acquired Time          | 3/13/2015 10:04:04 AM |

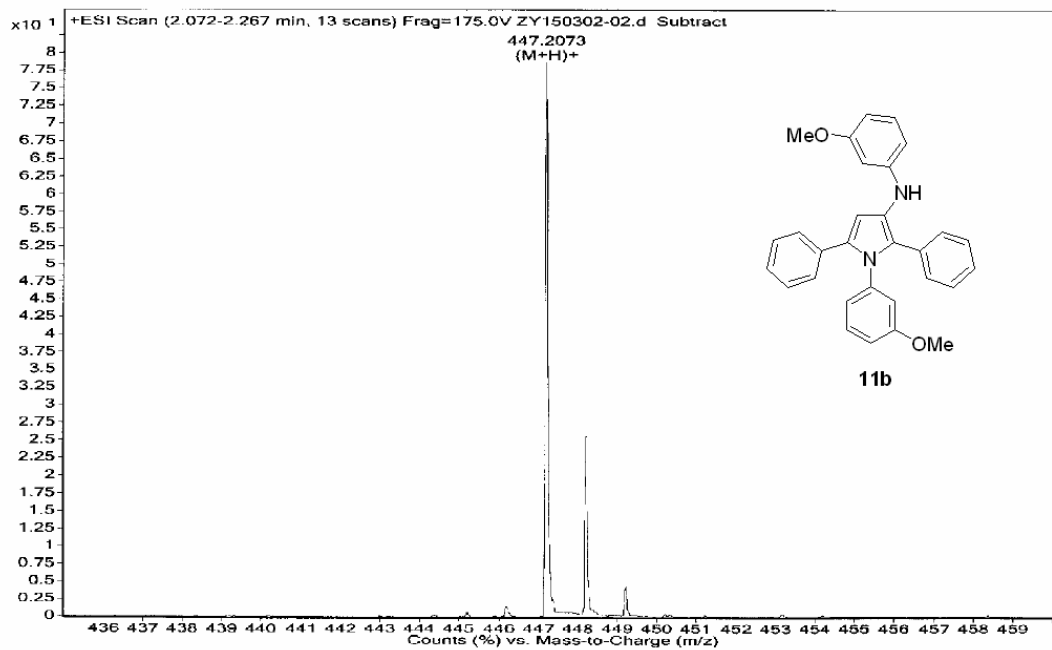

|               |             |             |           |                 |              |                        |                     |
|---------------|-------------|-------------|-----------|-----------------|--------------|------------------------|---------------------|
| Sample Name   | A5          | Position    | P1-A5     | Instrument Name | Instrument 1 | User Name              |                     |
| Inj Vol       | -1          | InjPosition |           | SampleType      | Sample       | IRM Calibration Status | Some Ions Missed    |
| Data Filename | ZY1412-10.d | ACQ Method  | chen-ms.m | Comment         |              | Acquired Time          | 3/13/2015 9:59:19 A |

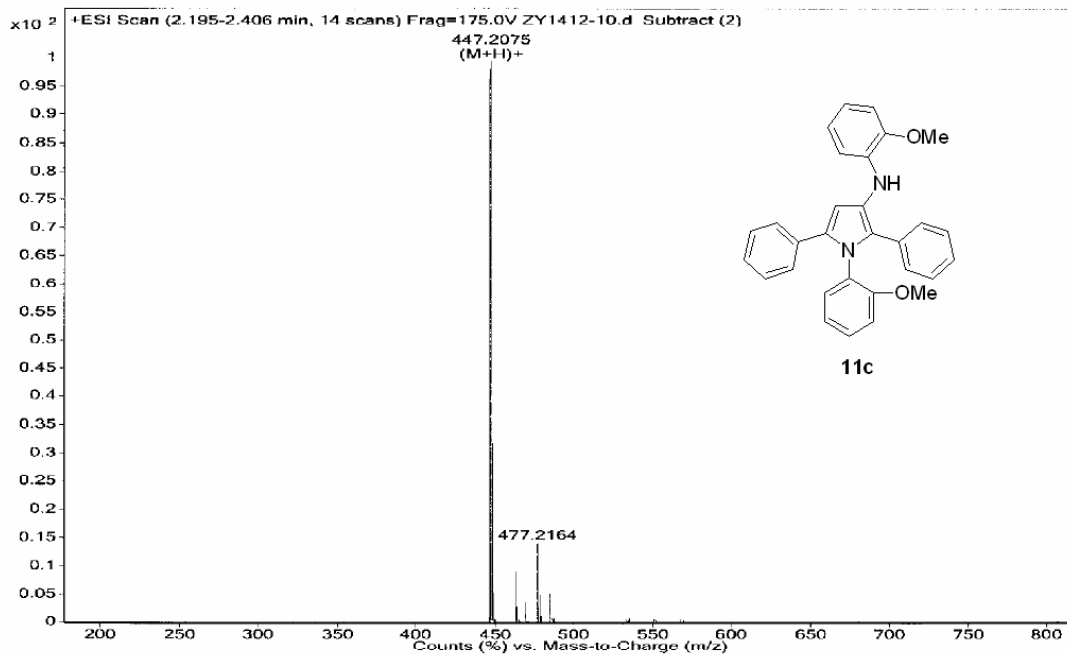

|               |            |             |           |                 |              |                        |                      |
|---------------|------------|-------------|-----------|-----------------|--------------|------------------------|----------------------|
| Sample Name   | A2         | Position    | P1-A2     | Instrument Name | Instrument 1 | User Name              |                      |
| Inj Vol       | -1         | InjPosition |           | SampleType      | Sample       | IRM Calibration Status | Some Ions Missed     |
| Data Filename | ZY1412-3.d | ACQ Method  | chen-ms.m | Comment         |              | Acquired Time          | 3/13/2015 9:45:05 AM |

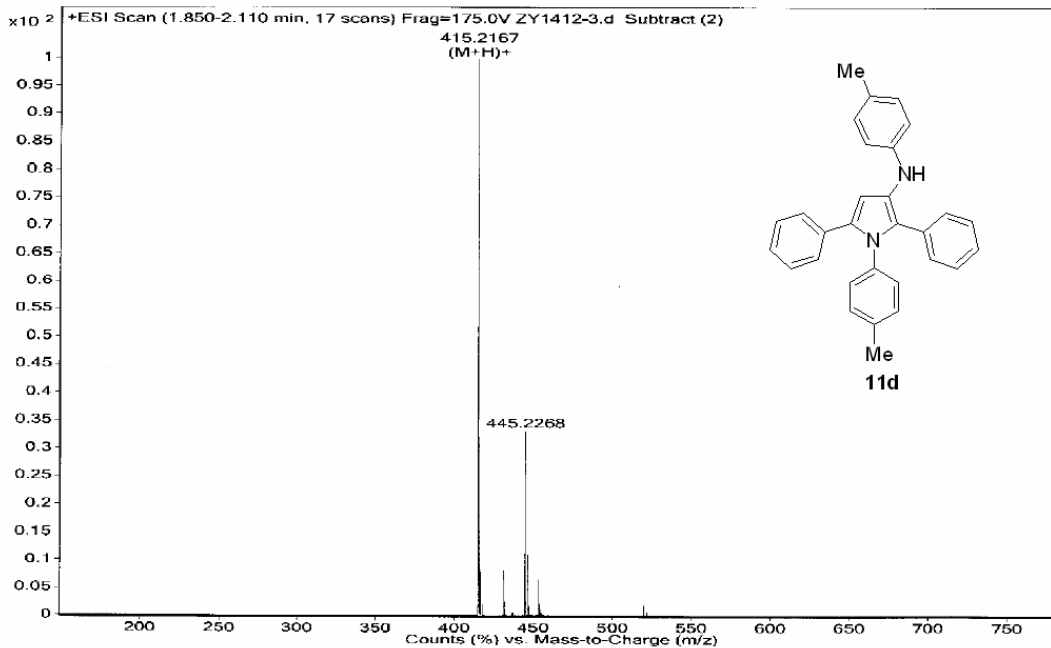

|               |            |             |           |                 |              |                        |                      |
|---------------|------------|-------------|-----------|-----------------|--------------|------------------------|----------------------|
| Sample Name   | A3         | Position    | PI-A3     | Instrument Name | Instrument 1 | User Name              |                      |
| Inj Vol       | -1         | InjPosition |           | SampleType      | Sample       | IRM Calibration Status | Some Ions Missed     |
| Data Filename | ZY1412-5.d | ACQ Method  | chen-ms.m | Comment         |              | Acquired Time          | 3/13/2015 9:49:49 AM |

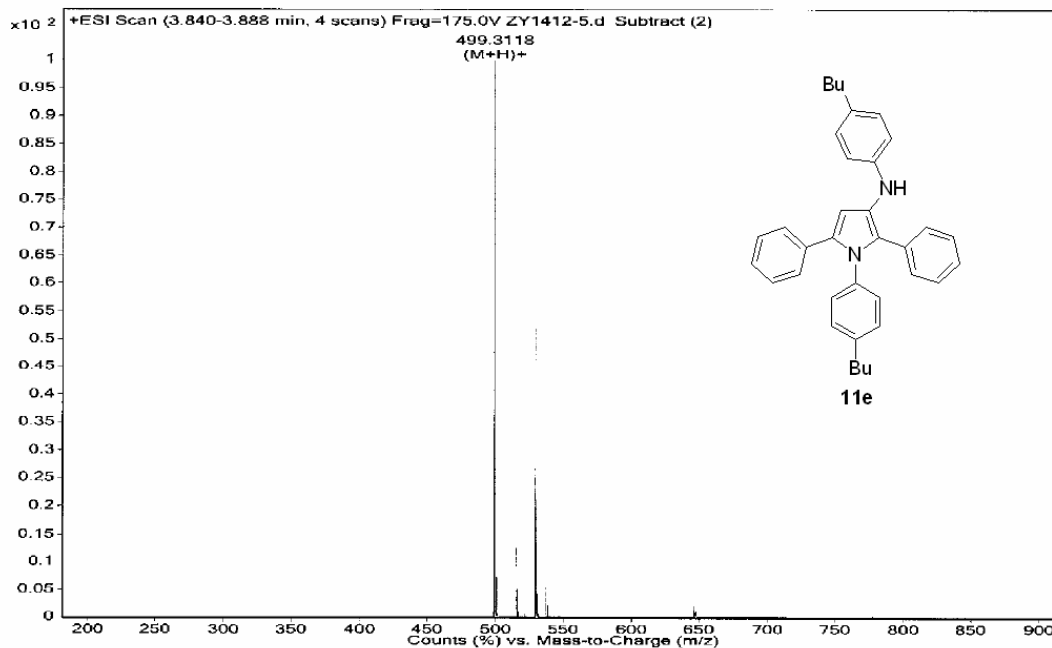

|               |            |             |           |                 |              |                        |                      |
|---------------|------------|-------------|-----------|-----------------|--------------|------------------------|----------------------|
| Sample Name   | A1         | Position    | PI-A1     | Instrument Name | Instrument 1 | User Name              |                      |
| Inj Vol       | -1         | InjPosition |           | SampleType      | Sample       | IRM Calibration Status | Some Ions Missed     |
| Data Filename | ZY1412-2.d | ACQ Method  | chen-ms.m | Comment         |              | Acquired Time          | 3/13/2015 9:40:20 AM |

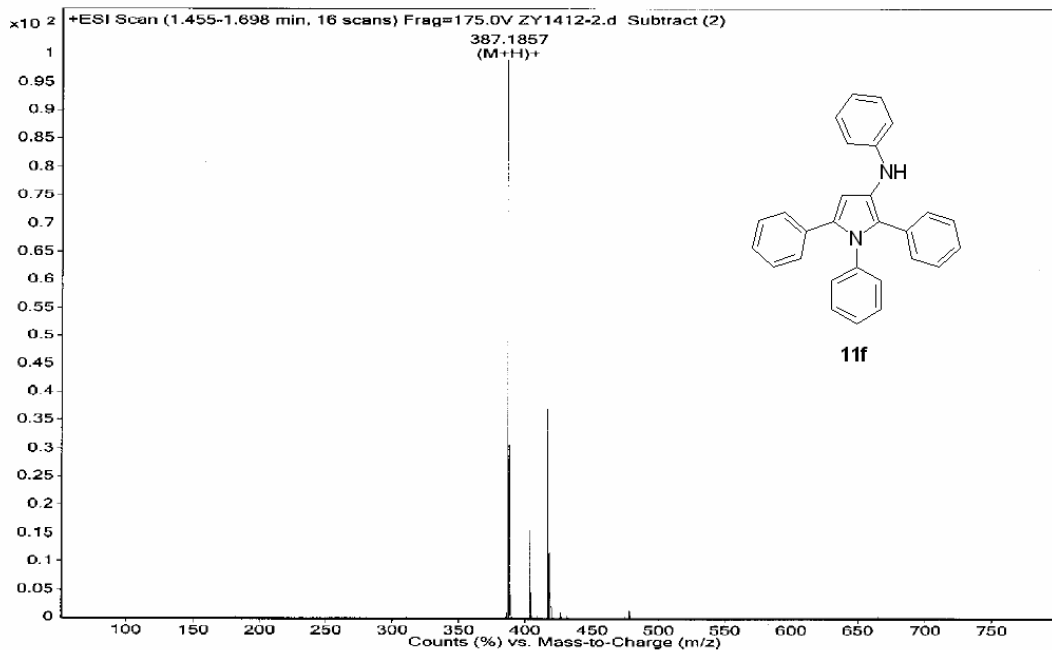



|               |            |             |          |                 |              |                        |                      |
|---------------|------------|-------------|----------|-----------------|--------------|------------------------|----------------------|
| Sample Name   | A4         | Position    | P1-A4    | Instrument Name | Instrument 1 | User Name              |                      |
| Inj Vol       | -1         | InjPosition |          | SampleType      | Sample       | IRM Calibration Status | Some Ions Missed     |
| Data Filename | ZY1412-6.d | ACQ Method  | den-ms.m | Comment         |              | Acquired Time          | 3/13/2015 9:54:34 AM |

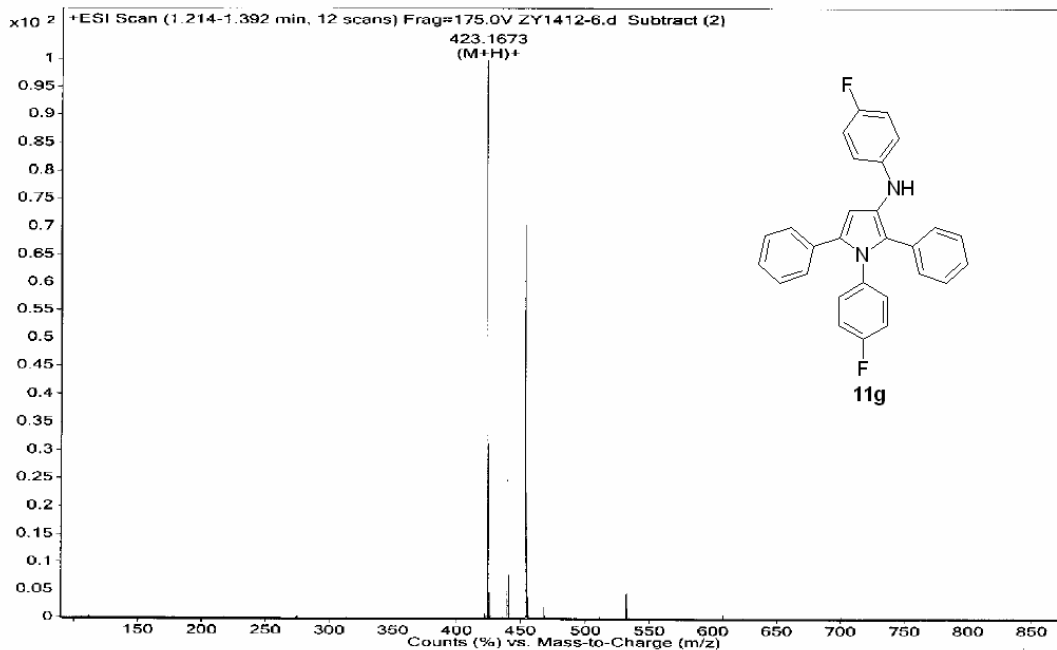

|               |          |             |          |                 |              |                        |                       |
|---------------|----------|-------------|----------|-----------------|--------------|------------------------|-----------------------|
| Sample Name   | A7       | Position    | P1-A7    | Instrument Name | Instrument 1 | User Name              |                       |
| Inj Vol       | -1       | InjPosition |          | SampleType      | Sample       | IRM Calibration Status | Some Ions Missed      |
| Data Filename | ZY14-2.d | ACQ Method  | den-ms.m | Comment         |              | Acquired Time          | 3/13/2015 10:08:49 AM |

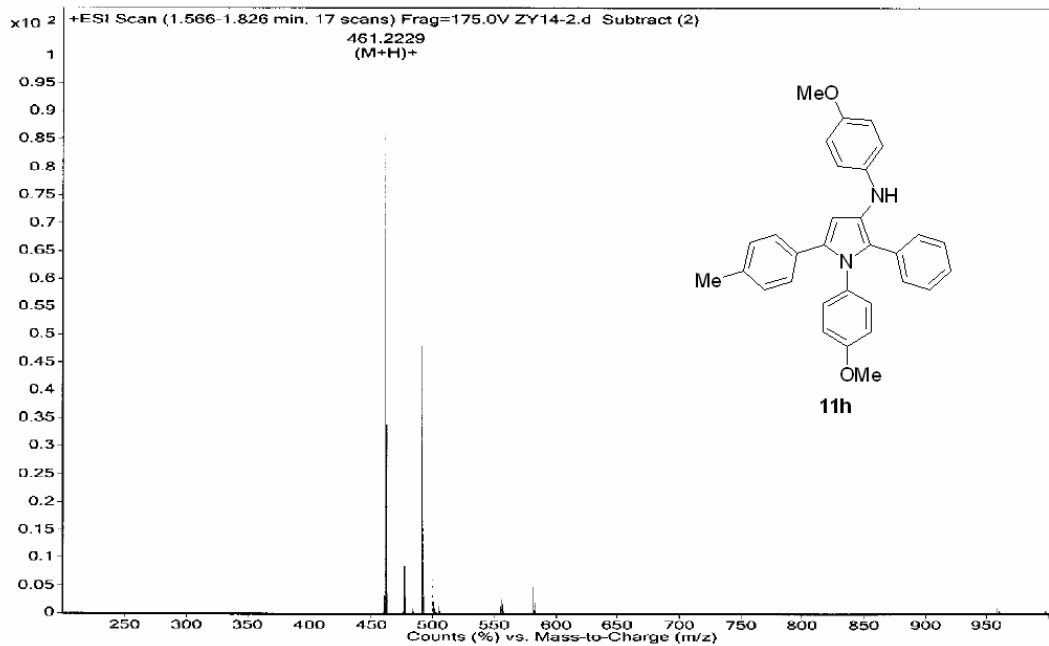

|               |          |             |           |                 |              |                        |                       |
|---------------|----------|-------------|-----------|-----------------|--------------|------------------------|-----------------------|
| Sample Name   | A8       | Position    | P1-A8     | Instrument Name | Instrument 1 | User Name              |                       |
| Inj Vol       | -1       | InjPosition |           | SampleType      | Sample       | IRM Calibration Status | Some Ions Missed      |
| Data Filename | ZY14-3.d | ACQ Method  | chen-ms.m | Comment         |              | Acquired Time          | 3/13/2015 10:13:34 AM |

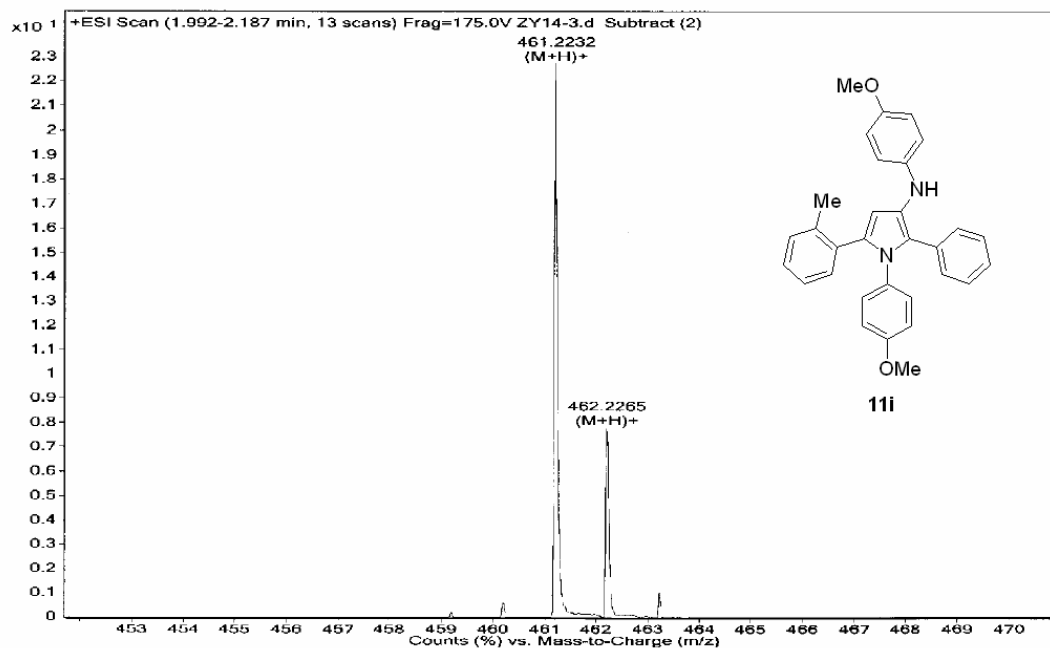

|               |          |             |           |                 |              |                        |                       |
|---------------|----------|-------------|-----------|-----------------|--------------|------------------------|-----------------------|
| Sample Name   | A9       | Position    | P1-A9     | Instrument Name | Instrument 1 | User Name              |                       |
| Inj Vol       | -1       | InjPosition |           | SampleType      | Sample       | IRM Calibration Status | Some Ions Missed      |
| Data Filename | ZY14-7.d | ACQ Method  | chen-ms.m | Comment         |              | Acquired Time          | 3/13/2015 10:16:18 AM |

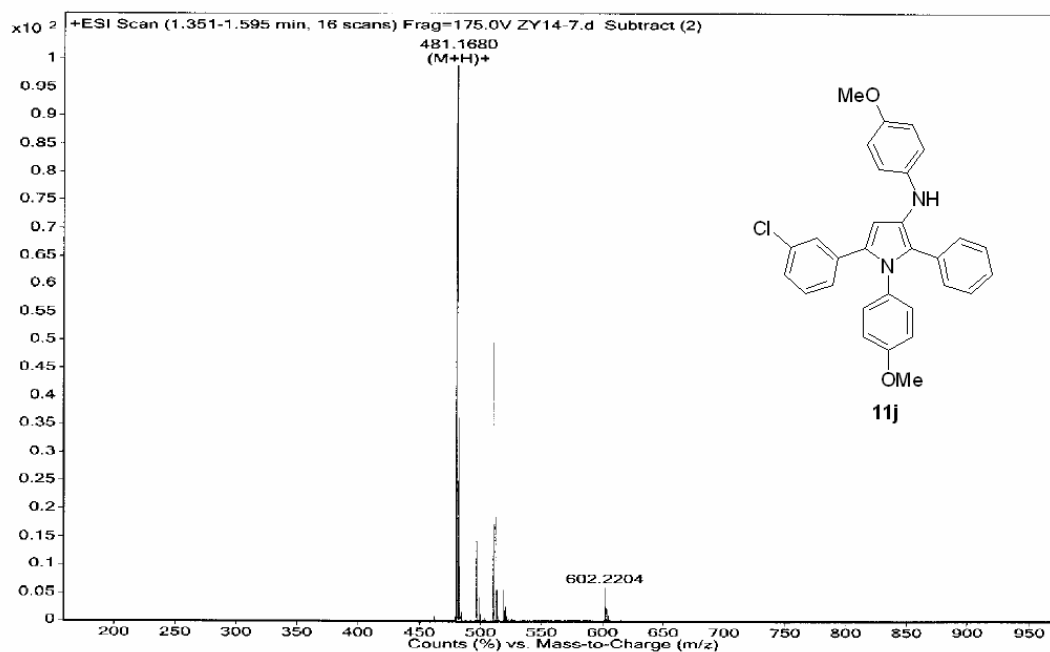

|               |          |             |           |                 |              |                        |                       |
|---------------|----------|-------------|-----------|-----------------|--------------|------------------------|-----------------------|
| Sample Name   | A10      | Position    | P1-B1     | Instrument Name | Instrument 1 | User Name              |                       |
| Inj Vol       | -1       | InjPosition |           | SampleType      | Sample       | IRM Calibration Status | Some Ions Missed      |
| Data Filename | ZY14-8.d | ACQ Method  | chen-ms.m | Comment         |              | Acquired Time          | 3/13/2015 10:23:03 AM |

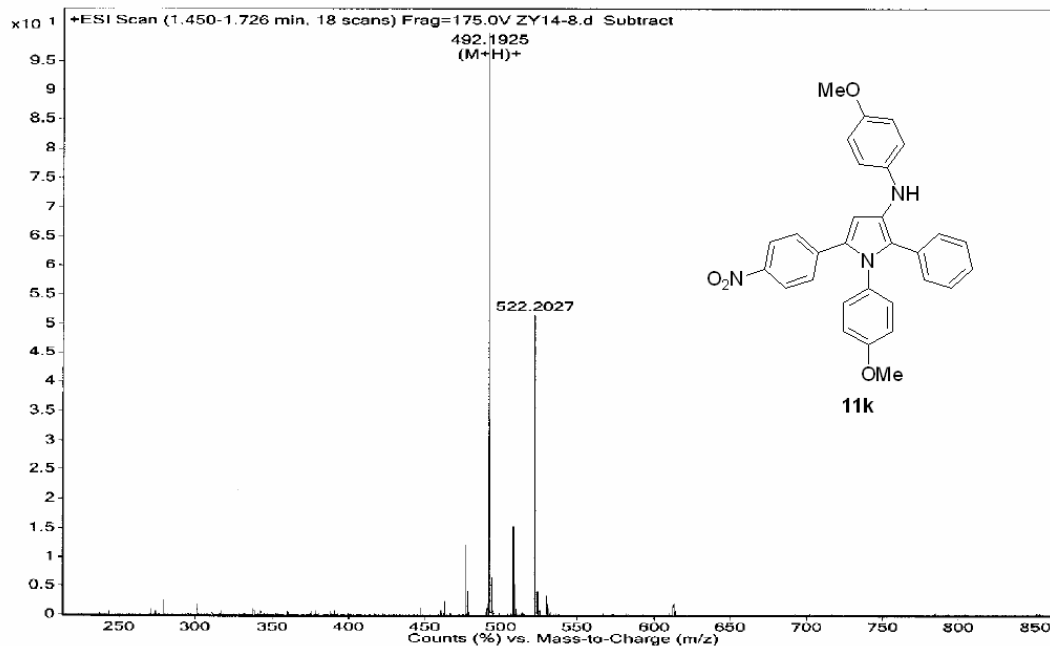

|               |           |             |           |                 |              |                        |                       |
|---------------|-----------|-------------|-----------|-----------------|--------------|------------------------|-----------------------|
| Sample Name   | A11       | Position    | P1-B2     | Instrument Name | Instrument 1 | User Name              |                       |
| Inj Vol       | -1        | InjPosition |           | SampleType      | Sample       | IRM Calibration Status | Some Ions Missed      |
| Data Filename | ZY14-12.d | ACQ Method  | chen-ms.m | Comment         |              | Acquired Time          | 3/13/2015 10:27:45 AM |

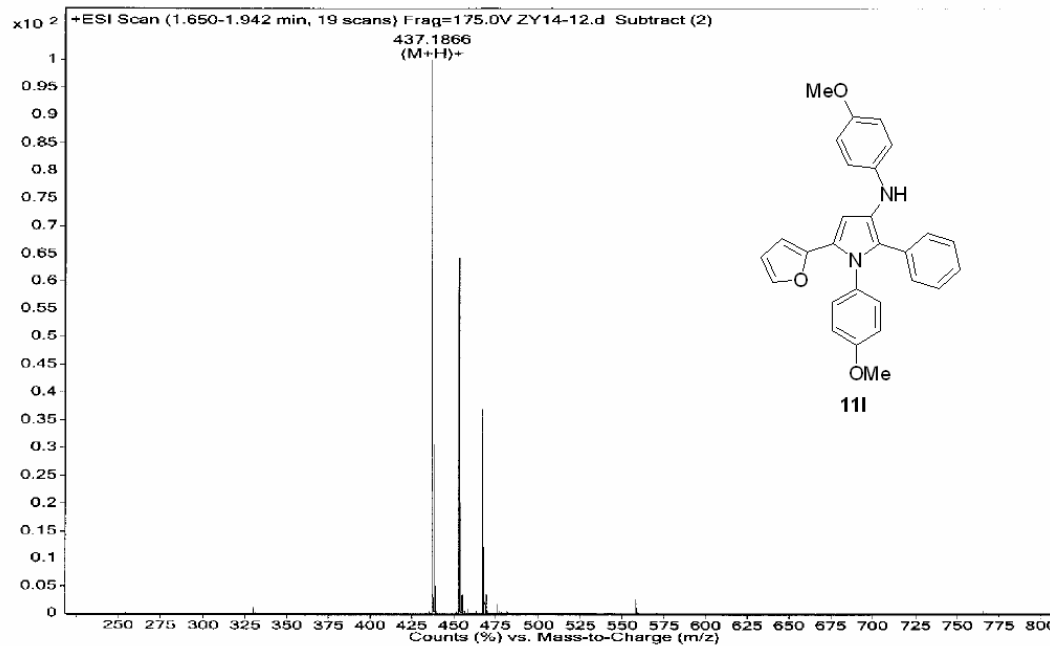

|                      |              |                    |           |                        |              |                               |                       |
|----------------------|--------------|--------------------|-----------|------------------------|--------------|-------------------------------|-----------------------|
| <b>Sample Name</b>   | A12          | <b>Position</b>    | P1-B3     | <b>Instrument Name</b> | Instrument 1 | <b>User Name</b>              |                       |
| <b>Inj Vol</b>       | -1           | <b>InjPosition</b> |           | <b>SampleType</b>      | Sample       | <b>IRM Calibration Status</b> | Some Ions Missed      |
| <b>Data Filename</b> | ZY150112-4.d | <b>ACQ Method</b>  | chem-ms.m | <b>Comment</b>         |              | <b>Acquired Time</b>          | 3/13/2015 10:32:34 AM |

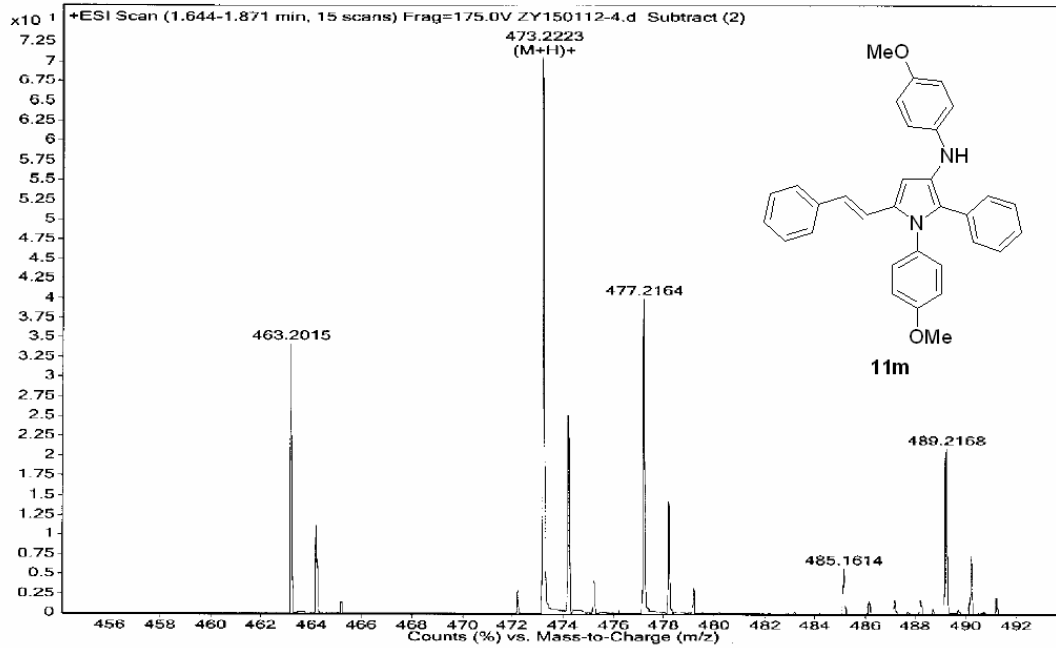

|                      |               |                    |           |                        |              |                               |                       |
|----------------------|---------------|--------------------|-----------|------------------------|--------------|-------------------------------|-----------------------|
| <b>Sample Name</b>   | A17           | <b>Position</b>    | P1-B8     | <b>Instrument Name</b> | Instrument 1 | <b>User Name</b>              |                       |
| <b>Inj Vol</b>       | 1             | <b>InjPosition</b> |           | <b>SampleType</b>      | Sample       | <b>IRM Calibration Status</b> | Some Ions Missed      |
| <b>Data Filename</b> | ZY150112-06.d | <b>ACQ Method</b>  | chem-ms.m | <b>Comment</b>         |              | <b>Acquired Time</b>          | 3/13/2015 10:56:20 AM |

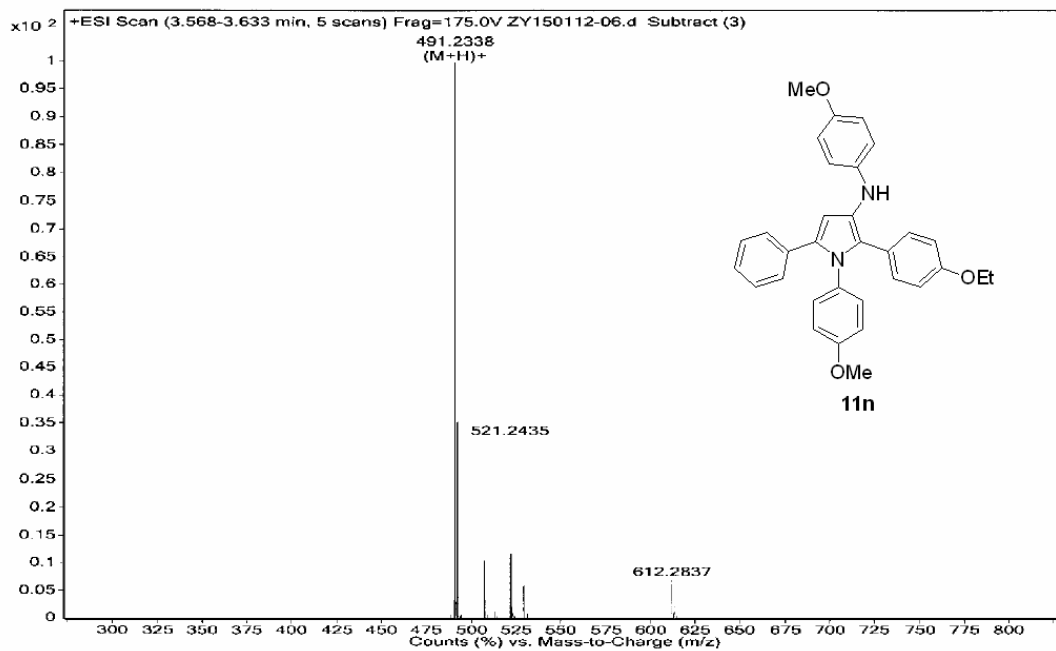

|               |               |             |           |                 |              |                        |                       |
|---------------|---------------|-------------|-----------|-----------------|--------------|------------------------|-----------------------|
| Sample Name   | A14           | Position    | P1-B5     | Instrument Name | Instrument 1 | User Name              |                       |
| Inj Vol       | -1            | InjPosition |           | SampleType      | Sample       | IRM Calibration Status | Some Ions Missed      |
| Data Filename | ZY1412-2202.d | ACQ Method  | chen-ms.m | Comment         |              | Acquired Time          | 3/13/2015 10:42:04 AM |

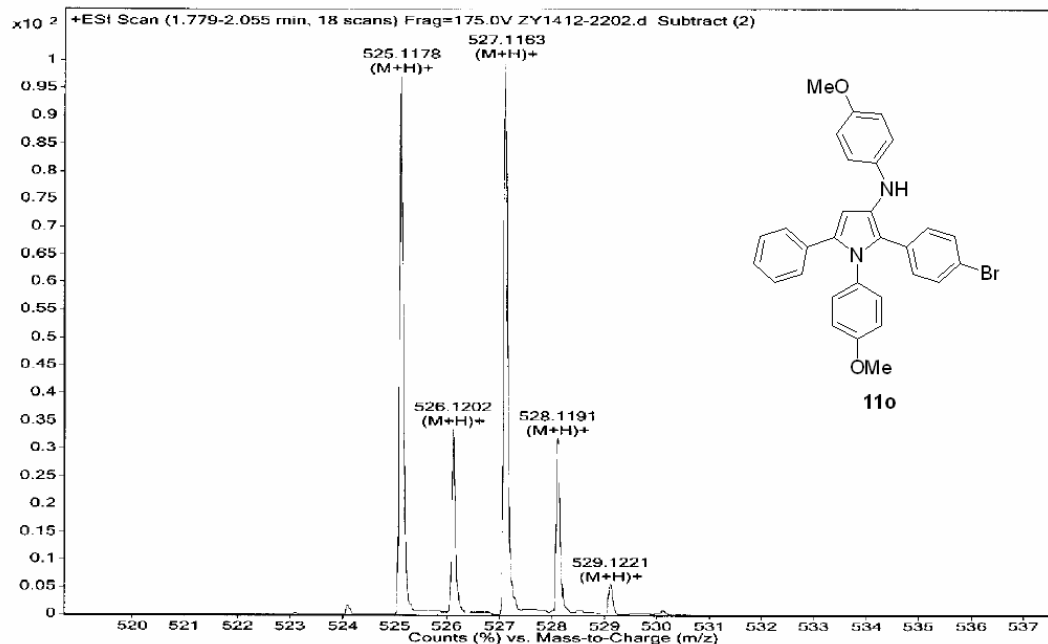

|               |               |             |           |                 |              |                        |                       |
|---------------|---------------|-------------|-----------|-----------------|--------------|------------------------|-----------------------|
| Sample Name   | A13           | Position    | P1-B4     | Instrument Name | Instrument 1 | User Name              |                       |
| Inj Vol       | -1            | InjPosition |           | SampleType      | Sample       | IRM Calibration Status | Some Ions Missed      |
| Data Filename | ZY1412-2201.d | ACQ Method  | chen-ms.m | Comment         |              | Acquired Time          | 3/13/2015 10:37:19 AM |

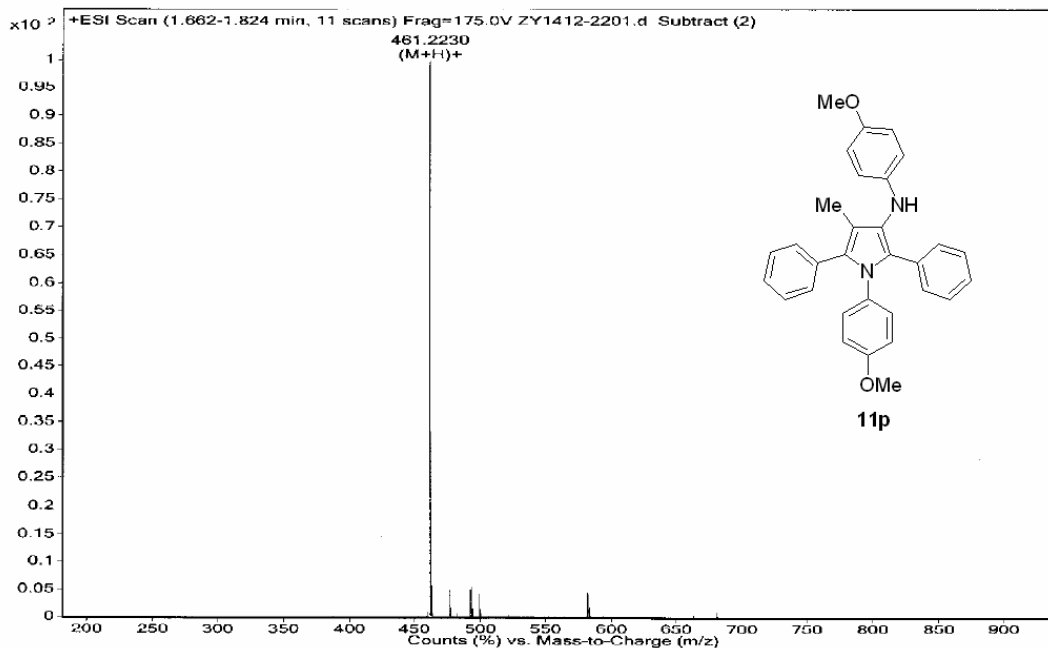

|               |               |             |           |                 |              |                        |                       |
|---------------|---------------|-------------|-----------|-----------------|--------------|------------------------|-----------------------|
| Sample Name   | A15           | Position    | P1-B6     | Instrument Name | Instrument 1 | User Name              |                       |
| Inj Vol       | -1            | InjPosition |           | SampleType      | Sample       | IRM Calibration Status | Some Ions Missed      |
| Data Filename | ZY1412-2203.d | ACQ Method  | chem.ms.m | Comment         |              | Acquired Time          | 3/13/2015 10:46:50 AM |

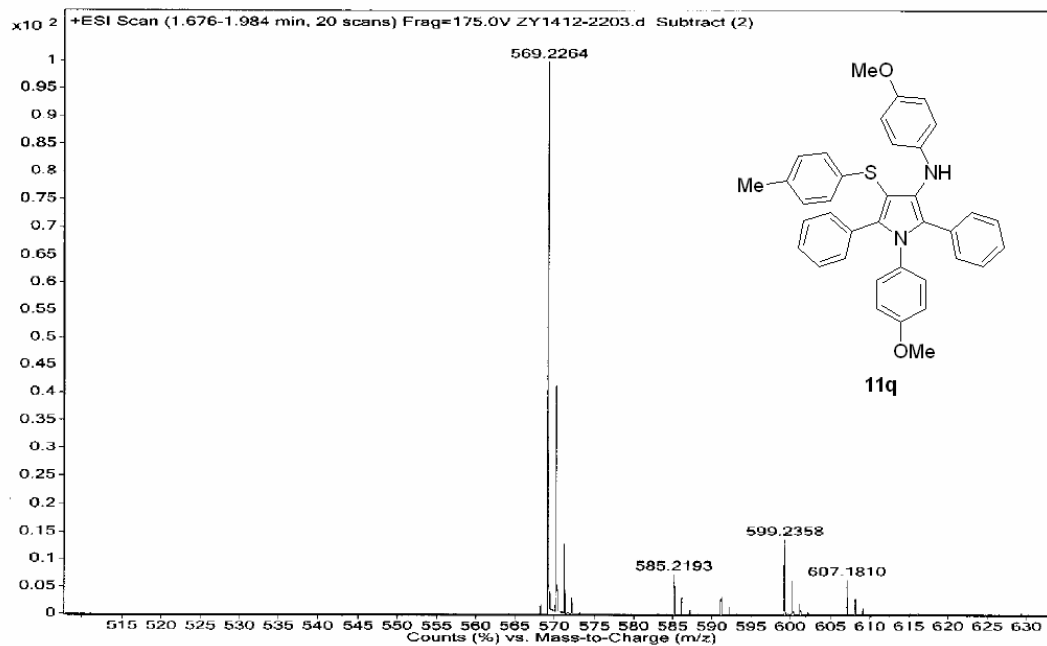

Varian ProMALDI  
File: zy0810-1\_MALDI.trans

Mode: Positive  
Scans: 1  
Date: 10-AUG-2015  
Time: 15:50:10  
Scale: 17.1978

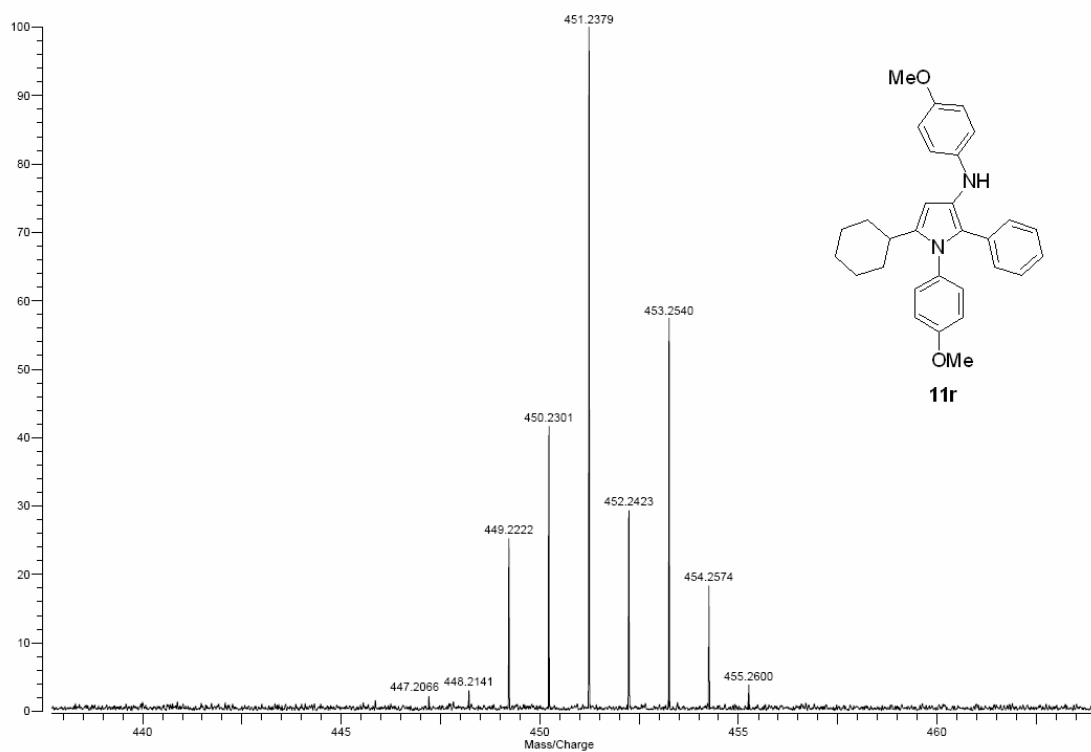

|               |        |             |           |                 |              |                        |                      |
|---------------|--------|-------------|-----------|-----------------|--------------|------------------------|----------------------|
| Sample Name   | lc/ms  | Position    | P1-A1     | Instrument Name | Instrument 1 | User Name              |                      |
| Inj Vol       | -1     | InjPosition |           | SampleType      | Sample       | IRM Calibration Status | Some Ions Missed     |
| Data Filename | ZY01.d | ACQ Method  | chen-ms.m | Comment         |              | Acquired Time          | 5/22/2015 9:54:24 AM |

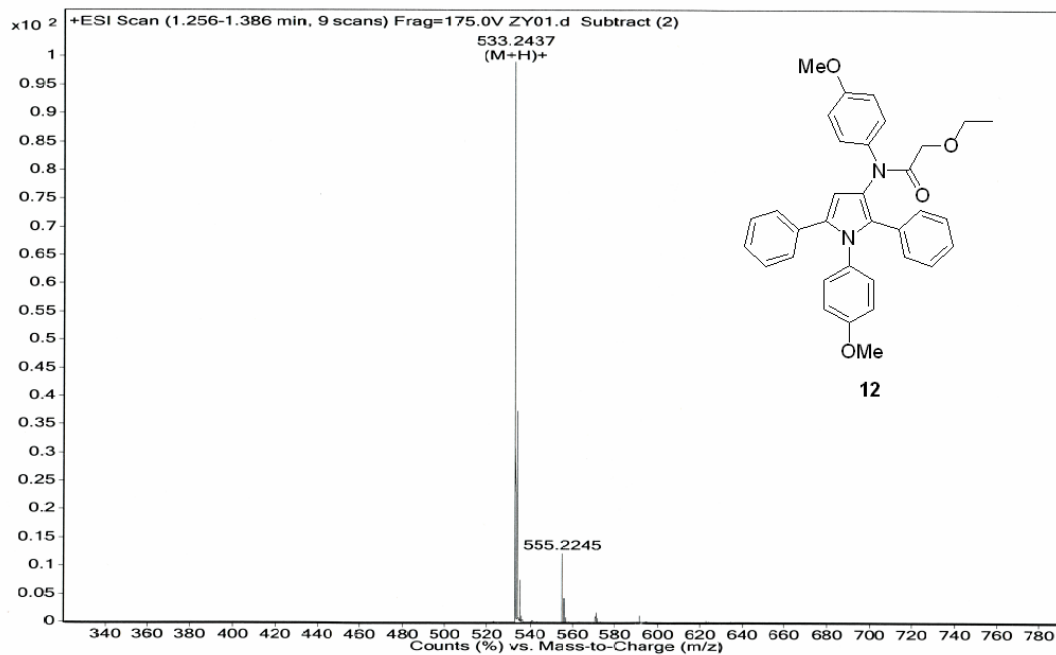

Supplement: c5cc05624a1.pdf [file c5cc05624a1.pdf]
